# Supplementary material
Source: PubMed Central journal article supplement (PMC7116333)
Supplement: EMS102272-supplement-Supplementary_Materials.pdf [file EMS102272-supplement-Supplementary_Materials.pdf]

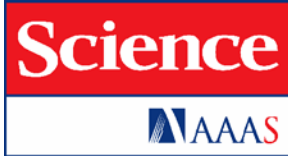

## Supplementary Materials for **Structure of a human 48S translational initiation complex**

Jailson Brito Querido\*, Masaaki Sokabe\*, Sebastian Kraatz\*, Yuliya Gordiyenko,  
J. Mark Skehel, Christopher S. Fraser†, V. Ramakrishnan†

\*These authors contributed equally to this work.

†Corresponding author. Email: csfraser@ucdavis.edu (C.S.F.); ramak@mrc-lmb.cam.ac.uk (V.R.)

Published 4 September 2020, *Science* **369**, 1220 (2020)  
DOI: 10.1126/science.aba4904

### **This PDF file includes:**

Materials and Methods  
Figs. S1 to S17  
Tables S1 to S3  
Caption for Movie S1  
References

### **Other Supplementary Material for this manuscript includes the following:**

(available at [science.sciencemag.org/content/369/6508/1220/suppl/DC1](https://science.sciencemag.org/content/369/6508/1220/suppl/DC1))

MDAR Reproducibility Checklist (.pdf)  
Movie S1 (.mp4)

## Materials and Methods

### Purification of human eIFs

Human initiation factors, ribosomes, capped mRNA, and tRNA<sub>i</sub><sup>Met</sup> for structural analysis were prepared as described previously (12, 47, 50). The eIF3c fragment (residues 1-165, 166-287, or 1-287) with N-terminal His- and MBP-tags and a TEV protease site was expressed in BL21 (DE3) cells at 30 °C for 4 hours. The protein was purified with nickel-nitrilo-triacetic acid agarose (Ni-NTA) resin (QIAGEN), and subsequently passed over a Mono Q (5/5) column (GE Healthcare) and eluted using a 50-500 mM KCl gradient.

The C-terminal fluorescent-labelled eIF4A was prepared in a similar way as the C-terminal labelled eIF1 described previously (1), but using expressed protein ligation instead of amine-aldehyde coupling. Briefly, eIF4A was expressed in BL21 (DE3) as a C-terminal fusion with the C-His6-tagged Mxe GyrA intein. To increase the intein cleavage and labelling efficiency, the construct had a single phenylalanine residue inserted between the C-terminus of eIF4A and the intein. The protein was purified using Ni-NTA resin, and then cleaved by incubating with 0.5 M sodium 2-mercaptoethanesulfonate (MESNA) overnight at 4 °C, yielding ~ 70% cleavage. The protein was precipitated and washed with 3 M ammonium sulfate to remove excess MESNA, resuspended and passed through Ni-NTA resin again to remove the uncleaved protein and cleaved intein. The protein was further purified with Q Sepharose resin (GE Healthcare) in a buffer supplemented with 10 mM MESNA, and step-wise eluted with 400 mM KCl buffer. The resulting eIF4A-MESNA (2.5 nmol) was ligated with 1 mM NH<sub>2</sub>-Cys-Lys-COOH dipeptide modified with 6-carboxyfluorescein at the side chain amine of lysine in the presence of 0.4 M 4-Mercaptophenylacetic acid, 10 mM tris(2-carboxyethyl)phosphine (TCEP), 200 mM Hepes.KOH pH 7.0, and 200 mM KCl in 50 µl reaction. The mixture was incubated overnight at 4 °C, yielding > 80% labelling efficiency. Free dipeptide was removed by repetitive dilution and concentration using Amicon Ultra (Millipore) until absorbance of the flowthrough reached an undetectable level.

### Functional analysis of the complex by RelE assay

For the RelE assay, capped RNAs were modified with fluorescein at the 3'-end as previously described (12). A plasmid expressing RelB-RelE was a gift from Prof. Strobel in Yale University. RelE protein was expressed and purified as previously described (51). RelE assay was done essentially as described previously (11). For better quantification, mRNA cleavages were directly detected by gel imaging of 3'-end fluorescent RNA fragments instead of using reverse transcription with radioactive nucleotides. The 43S PIC (500 nM eIF1/1A/3j/5, 300 nM eIF2, 350 nM Met-tRNA<sub>i</sub>, 200 µM GMPPNP, 250 nM eIF3, and 200 nM 40S subunit) in buffer A (20 mM tris-acetate pH 7.5, 70 mM KCl, 2.5 mM MgCl<sub>2</sub>, 0.1 mM spermidine, 1 mM DTT, and 10% glycerol) was preincubated for 10 min at 37 °C in the presence or absence of eIF4F/4B (500 nM eIF4A/4B/4E, and 400 nM eIF4G (residue 557-1599)). The reaction was initiated by adding 50 nM labeled RNA together with 0.5 mM ATP-Mg or its analog, and was further incubated at 37 °C. At each time point, 8 µl reaction was withdrawn, and cleaved by 8 µM RelE in the presence of 2.5 µM competitor RNA (50-fold molar excess) to stop further recruitment of the substrate. The competitor RNA had a sequence identical to the substrate, but lacking fluorescent probe. After 10 min cleavage at 37 °C, the reaction was quenched by adding 10 µl of 10 M urea. The RNA was resolved by 10% polyacrylamide gel in 73 mM sodium-borate pH 8.1 buffer with 8 M urea, and imaged by LAS-4000 fluorescence image analyzer (GE Life Sciences). The amount of cleavage was quantified as a sum of cleavages at two AUGs, and was normalized to a total intensity of cleaved and uncleaved bands in each lane. The background cleavage (normally ~1%) was

measured by adding RelE and a competitor RNA together with the substrate RNA at time 0, and was subtracted from quantifications of kinetic measurements. RelE cleavage was absolutely dependent on both 40S and eIF2 ternary complex, and no cleavage at non-AUG codon was observed under the experimental condition (Fig. S1A).

#### MBP-pulldown assay

50 pmol of purified MBP tagged eIF3c (residues 1-287, 1-165, or 166-287) or MBP was mixed with 100 pmol of eIF1 in 50  $\mu$ l reaction buffer containing 20 mM HEPES-K pH 7.5, 100 mM KCl, 2 mM MgCl<sub>2</sub>, 10% glycerol, 1 mM DTT, and 0.1% Nonidet P-40. The reaction mixture was incubated at 37 °C for 10 min. 50  $\mu$ l of 40% amylose resin slurry (New England Biolab) in the reaction buffer was added and incubated on a rotator at 4 °C for 30 min. The resin was washed with 100  $\mu$ l reaction buffer three times, and then boiled with 50  $\mu$ l SDS gel loading buffer. The proteins were resolved on 15% SDS gel, and stained with Coomassie dye.

#### Fluorescence anisotropy assay

Fluorescence anisotropy assay was done essentially as described previously (50). Briefly, 20 nM fluorescent eIF4A was mixed with 0-700 nM eIF3 in the presence or absence of 1  $\mu$ M eIF4G. We used the middle domain of eIF4G (residues 682-1104), a region that closely resembles the one we modeled in the structure. 20  $\mu$ l reaction was incubated for 5 min at 37 °C, and further incubated for > 20 min at room temperature before measurement.

#### Reconstitution of human 48S pre-initiation complex for cryo-EM

48S complex was assembled by mixing 43S with eIF4F and eIF4B in a 50  $\mu$ l reaction. The 43S was reconstituted by mixing 0.5  $\mu$ M eIFs and 0.3  $\mu$ M 40S, in buffer (97 mM KAc, 2.5 mM MgAc, 3% glycerol, 0.1 mM spermidine, 1mM DTT and 0.5 mM GMP-PNP) to a final volume of 26  $\mu$ l. The reaction mix was incubated at 30 °C for 10 min. eIF4F was reconstituted by mixing 0.5  $\mu$ M eIF4G (557-1599), 1  $\mu$ M eIF4A, eIF4E, mRNA, and eIF4B, to a final volume of 24  $\mu$ l, in the same buffer used to assemble the 43S, but supplemented with 0.5 mM ATP- $\gamma$ -S instead of GMP-PNP.

#### Characterization of human 48S by SEC and western immunoblotting

For biochemical purpose only, a 48S complex was assembled as described for cryo-EM, in a buffer supplemented with 0.5 mM ATP- $\gamma$ -S. The assembled complex was purified from free eIFs using size exclusion chromatography (SEC) as previously described (52). The protein composition of purified 48S was analysed by SDS-PAGE and stained with SYPRO Ruby (Bio-Rad). In parallel, proteins were also transferred to a nitrocellulose membrane (Bio-Rad). The membrane was incubated with primary antibodies against eIF4A (abcam, ab31217), eIF4E (abcam, ab33766), eIF4G (abcam, ab2609), eIF4B (abcam, ab186856) and the ribosomal protein eS24 (abcam, ab196652). Fluorescently-labelled secondary antibody conjugates were used to detect eIFs.

#### Characterization of eIF4F-eIF3 complexes by SEC followed by Cross-linking mass spectrometry (XL-MS)

eIF3-eIF4F complex was assembled by mixing 4  $\mu$ M eIF4F with 2  $\mu$ M eIF3. The reaction mix was incubated at 30 °C for 10 min and purified from free factors by SEC. Spermidine (a polyamine with quenching properties) was omitted from the reaction mix. Purified complexes were cross-linked with a 300-fold excess of the N-hydroxysuccinimide (NHS) ester disuccinimidyl dibutyric

urea (DSBU, ThermoScientific, USA), with respect to the protein concentration. The cross-linking reactions were incubated for 60 minutes at room temperature and then quenched by the addition of  $\text{NH}_4\text{HCO}_3$  to a final concentration of 20 mM and incubated further for 15 min.

The cross-linked proteins were reduced with 10 mM DTT and alkylated with 50 mM iodoacetamide. Following alkylation, the proteins were digested with trypsin (Promega, UK) at an enzyme-to-substrate ratio of 1:100, for 1 hour at room temperature and then further digested overnight at 37 °C following a subsequent addition of trypsin at a ratio of 1:20.

The peptide digests were then fractionated batch wise by high pH reverse phase chromatography on micro spin C18 columns (Harvard Apparatus, USA), into four fractions (10 mM  $\text{NH}_4\text{HCO}_3$  /10 % (v/v) acetonitrile pH 8, 10 mM  $\text{NH}_4\text{HCO}_3$  /20 % (v/v) acetonitrile pH 8, 10 mM  $\text{NH}_4\text{HCO}_3$  /40 % (v/v) acetonitrile pH 8 and 10 mM  $\text{NH}_4\text{HCO}_3$  /80 % (v/v) acetonitrile pH 8. The 150  $\mu\text{l}$  fractions were evaporated to dryness on a CoolSafe lyophilizer (ScanVac, Denmark) prior to analysis by LC-MS/MS.

Lyophilized peptides for LC-MS/MS were resuspended in 0.1 % (v/v) formic acid and 2 % (v/v) acetonitrile and analyzed by nano-scale capillary LC-MS/MS using an Ultimate U3000 HPLC (ThermoScientific Dionex, USA) to deliver a flow of approximately 300 nl/min. A C18 Acclaim PepMap100 5  $\mu\text{m}$ , 100  $\mu\text{m}$   $\times$  20 mm nanoViper (ThermoScientific Dionex, USA), trapped the peptides before separation on a C18 Acclaim PepMap100 3  $\mu\text{m}$ , 75  $\mu\text{m}$   $\times$  250 mm nanoViper (ThermoScientific Dionex, USA). Peptides were eluted with a gradient of acetonitrile. The analytical column outlet was directly interfaced via a nano-flow electrospray ionisation source, with a quadrupole Orbitrap mass spectrometer (Q-Exactive HFX, ThermoScientific, USA). MS data were acquired in data-dependent mode using a top 10 method, where ions with a precursor charge state of 1+ and 2+ were excluded. High-resolution full scans ( $R=120\,000$ ,  $m/z$  300-1800) were recorded in the Orbitrap followed by higher energy collision dissociation (HCD) (stepped collision energy 26 and 28 % Normalized Collision Energy) of the 10 most intense MS peaks. The fragment ion spectra were acquired at a resolution of 50 000 and dynamic exclusion window of 20s was applied.

For data analysis, Xcalibur raw files were converted into the MGF format using Proteome Discoverer version 2.3 (ThermoScientific, USA) and used directly as input files for MeroX (53). Searches were performed against an ad hoc protein database containing the sequences of the proteins in the complex and a set of randomized decoy sequences generated by the software. The following parameters were set for the searches: maximum number of missed cleavages 3; targeted residues K, S, Y and T; minimum peptide length 5 amino acids; variable modifications: carbamidomethylation of cysteine (mass shift 57.02146 Da), Methionine oxidation (mass shift 15.99491 Da); DSBU modified fragments: 85.05276 Da and 111.03203 Da (precision: 5 ppm MS and 10 ppm MS/MS); False Discovery Rate cut-off: 5 %. Finally, each fragmentation spectrum was manually inspected and validated.

#### Cryo-EM grid preparation and data acquisition

To increase the occupancies of eIFs in the complex, the 48S was further stabilized by chemical crosslinking using 1.5 mM BS3 (final concentration) on ice for 30 min. 3  $\mu\text{l}$  of 130 nM 48S complex (without any further purification step after the *in vitro* reconstitution) was applied onto

glow-discharged Quantifoil R2/2 copper grids pre-covered with thin layer of carbon ( $\sim 20\text{\AA}$ ) made in-house. Cryo-EM grids were prepared using a FEI Vitrobot Mark IV at  $4^\circ\text{C}$  and 100% humidity. The grids were plunged into liquid ethane at 93 K in a precision cryostat system (54). Because the crosslinking reaction was performed on ice and in the presence of spermidine (a polyamine with quenching properties), as expected we observed a mild crosslinking effect, confirmed by the absence of aggregates in cryo-EM grids, when compared with the grids prepared without BS3.

Three independent data sets were collected on Titan Krios microscopes (ThermoFisher) equipped with Falcon III direct electron detector (FEI) at a magnification of 75,000x and at pixel sizes of  $1.085\text{ \AA pix}^{-1}$  (dataset 1 and 2) or  $1.094\text{ \AA pix}^{-1}$  (48S without eIF4B). 39 frames were collected for 1 s in linear mode with defoci ranging from  $-1.8\text{ }\mu\text{m}$  to  $-3.0\text{ }\mu\text{m}$ , and fluxes of  $102\text{--}107\text{ e/\AA}^2/\text{s}$ .

### Image processing

Motion correction was performed using RELION 3's own implementation (55). Movies were aligned using  $5\times 5$  patches with dose-weighting. CTF was estimated using CTFFIND4 (56). The crystal structure of mammalian 40S (57) was used to simulate a map and used after lowpass filtering to  $60\text{ \AA}$  as a reference for the initial 3D classification. After focused classification on various regions of the map and 3D refinement, Bayesian polishing in RELION was used for beam-induced motion correction (55). The predominant molecular motions were accounted for by multi-body refinement and flexibility analysis in RELION (58). All reported resolutions are based on the gold-standard Fourier shell correlation (FSC) = 0.143 criterion (59).

### Model building, fitting and refinement

The eIFs models were generated by SWISS-MODEL (60) using previous cryo-EM and crystal structures (10, 19, 31, 49, 57, 61–63). Parts of some subunits, such as eIF3a, eIF3c, eIF3d, eIF3e and eIF3j were built *de novo*.

The model for the C-terminal domain of eIF3j was obtained by homology modelling using the crystal structure of human eIF3j (PDB: 3BPJ) and the main chain was further modelled by first predicting its secondary structure using PSIPRED (64). The main chain for the N-terminal domain was modelled based on the secondary structure prediction and refined into our map. The main chain for the low-resolution parts were modelled as poly-alanines.

eIF3g-RRM was modelled using the NMR structure of eIF3g (2CQ0) and further adjusted into our map in Coot.

eIF3c-NTD was built *de novo*.

The crystal structure of the partial eIF4G-eIF4A complex from yeast (31) was used to generate a homology models with the human sequences and fitted as a rigid body into the density.

Because the mRNA used lacks a start site, its structure in the channel is heterogenous. Thus, the model contains only the phosphate backbone. The 40S small ribosomal subunit was modelled based on a previous cryo-EM structure of human 80S (65). The high local resolution permitted *de novo* building and revealed chemical modifications previously reported in the human 80S (65).

Manual fitting and refinement was performed in Coot (66). Real space refinement was performed using phenix.real\_space\_refine (67).

40S and eIFs models were generated using cryo-EM maps obtained after multi-body refinement. Thus, each body was deposited with the corresponding map. To generate a global 48S, each model was rigid body fitted (using Chimera) into the density of global 48S obtained prior the multi-body

refinement. Three rounds of global optimization in phenix real space refinement and manual refinement in coot were also performed to improve the fit and remove clashes.

#### Figures and movie

Protein multiple sequence alignment was performed using the MPI Bioinformatics Toolkit (68). The figures were made in Chimera (69) and ChimeraX (70). The movie was made in PyMOL (Schrödinger).

The comparison between human 48S and previous structures of yeast 48S was performed by superimposing the two structures. 18S rRNA phosphate backbone was taken as a reference for structural alignments.



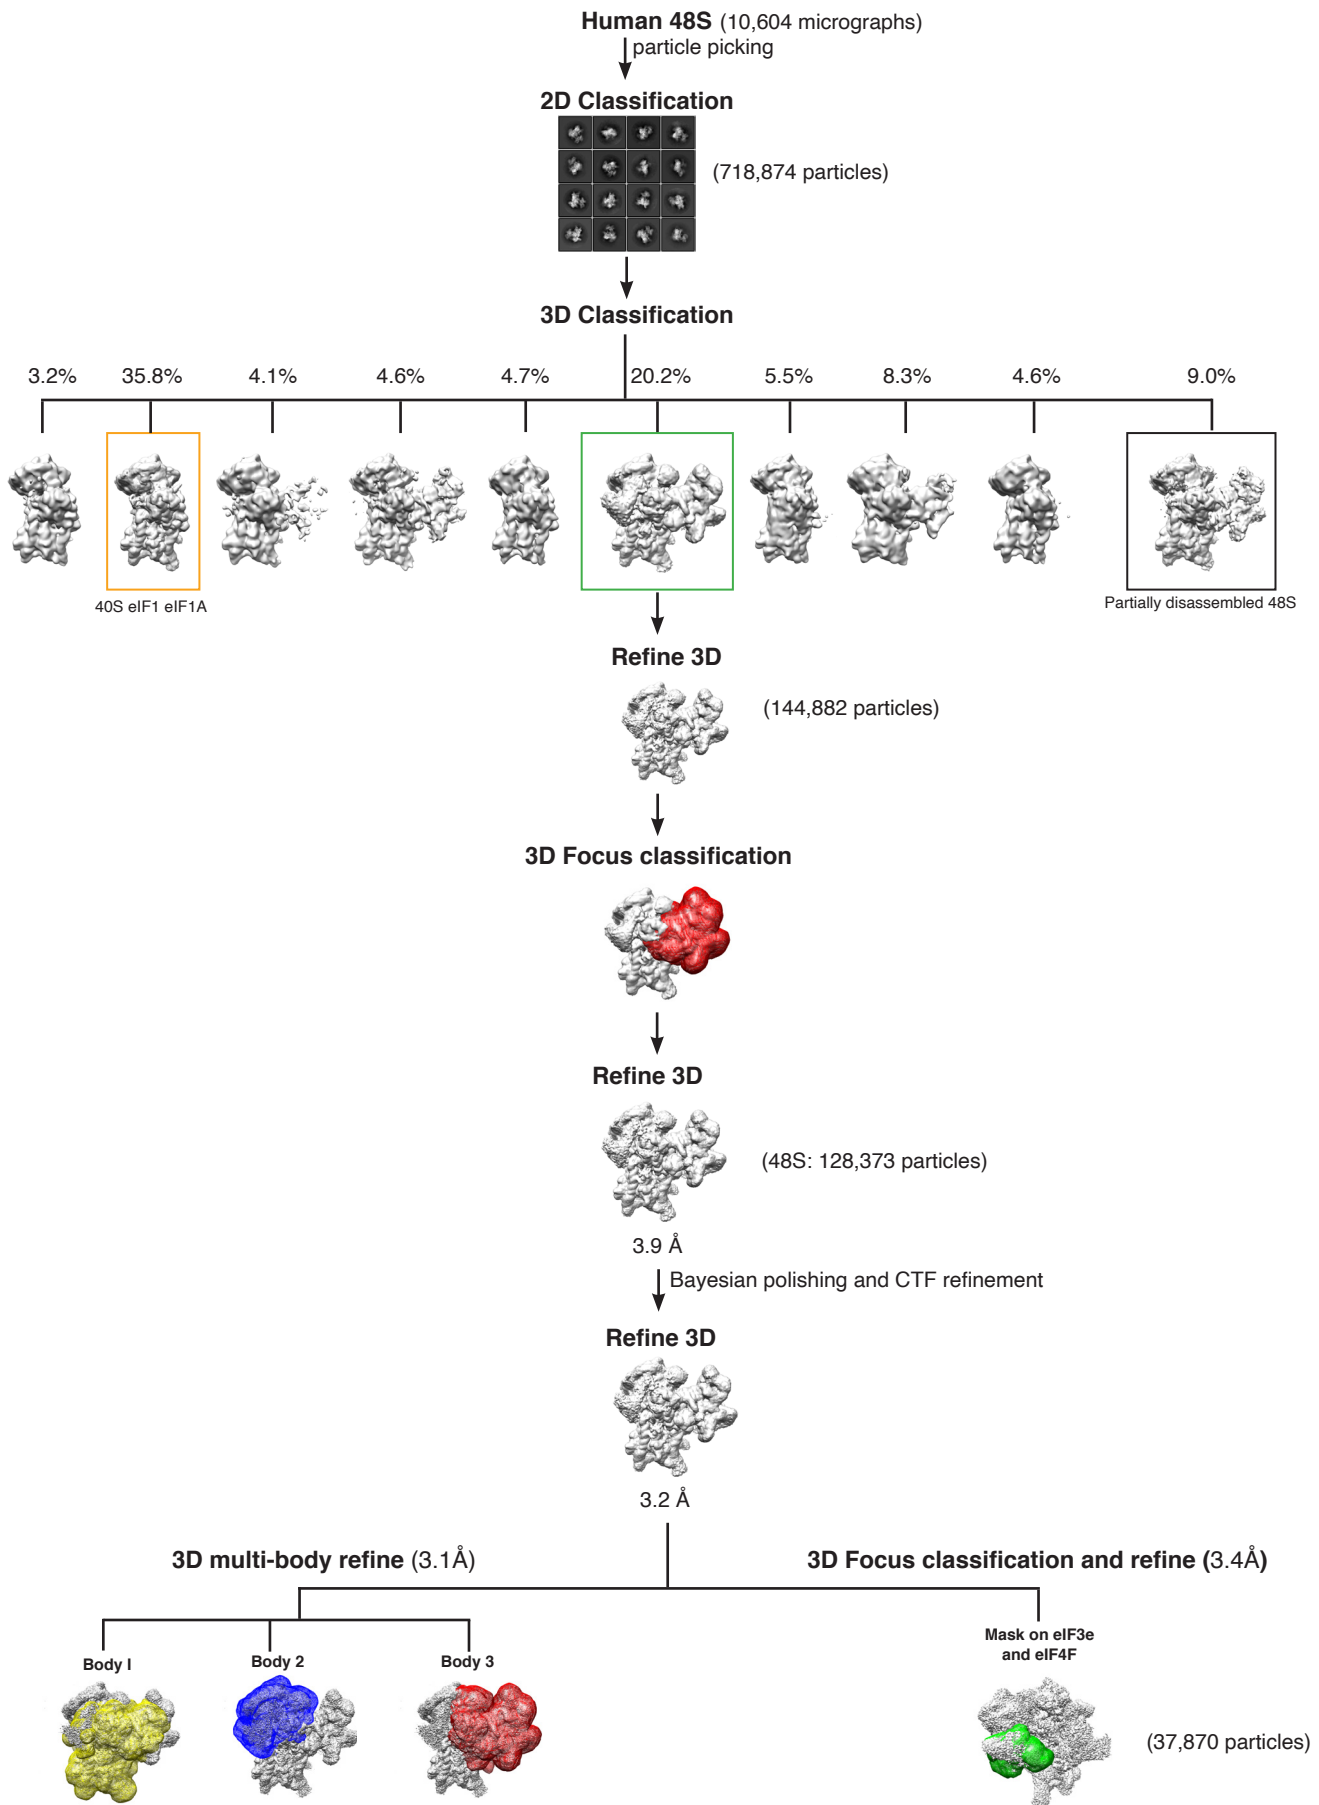

**Figure S2: Cryo-EM analysis of human 48S.** Data processing scheme used for structure determination of BS3 crosslinked 48S is shown. The main class (35.8%) correspond to 40S-eIF1-eIF1A particles. 20.2% of the particles are 48S and contain density for all 13 subunits of eIF3. Further 3D focus classification with signal subtraction was undertaken. 29.5% of 48S contain the additional density for eIF4F.



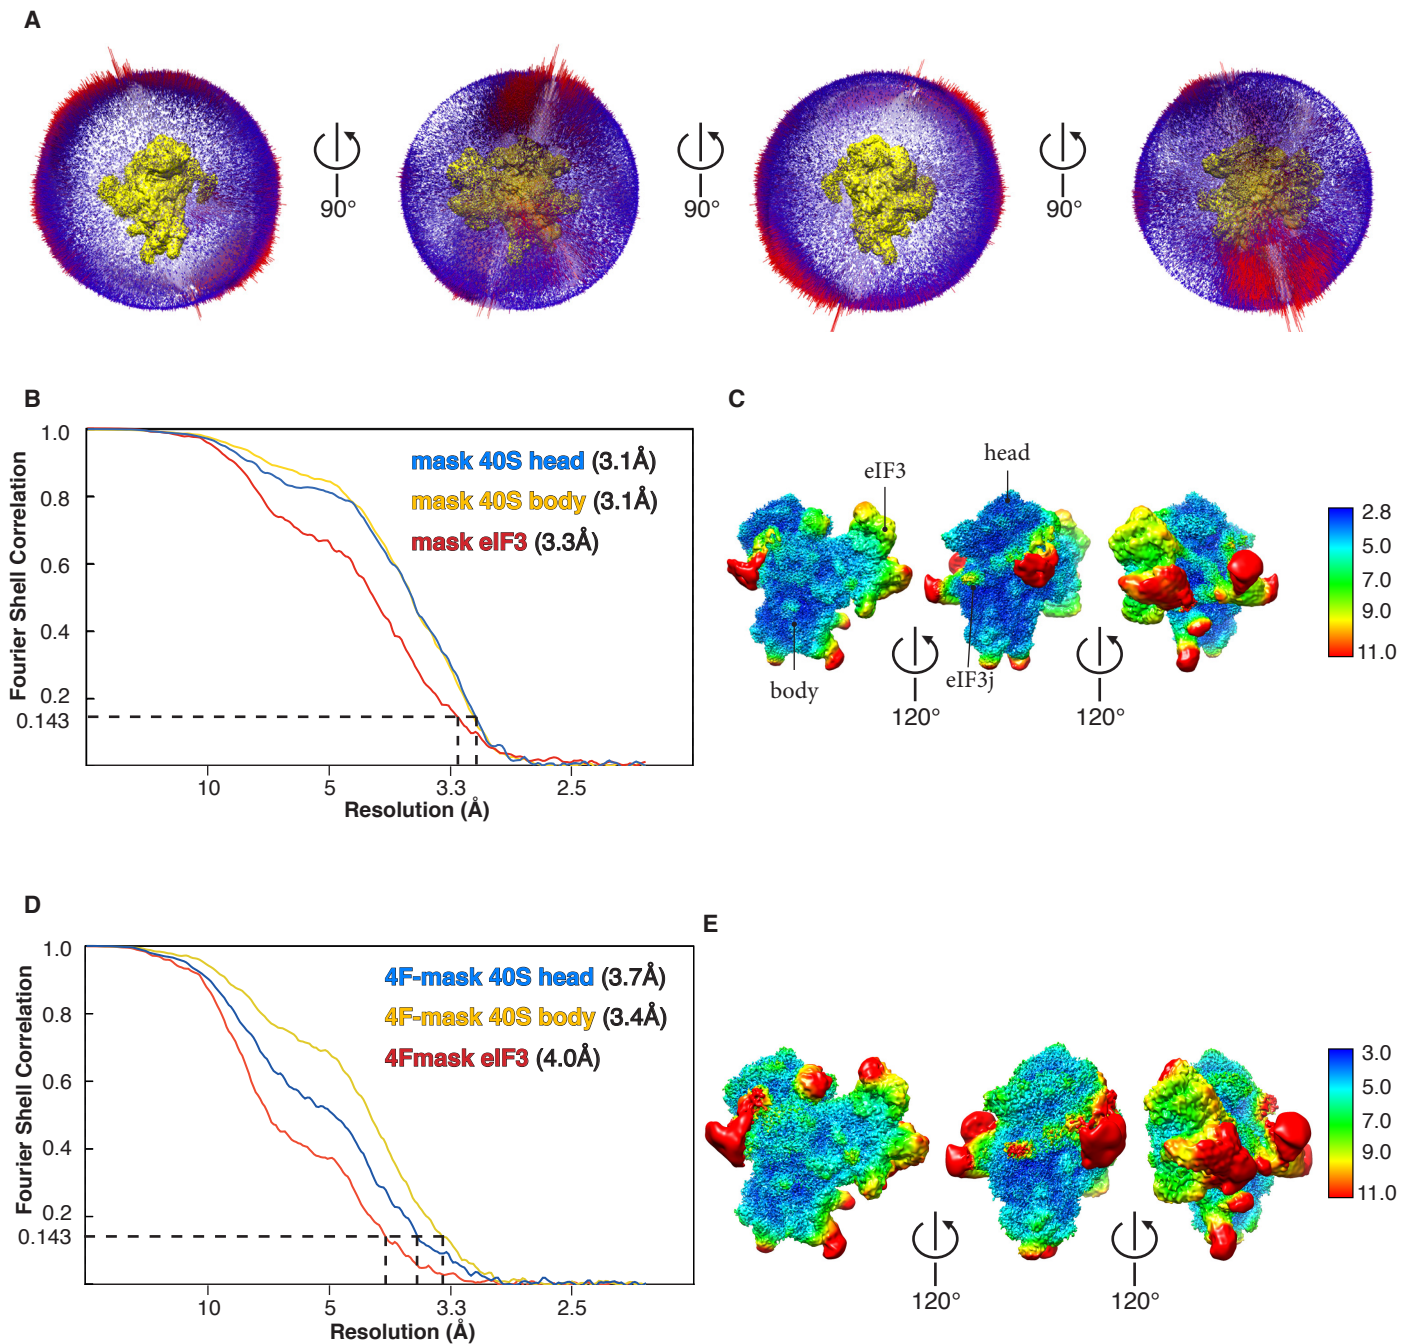

**Figure S3: Particles distribution and resolution. A)** Angular distribution plot of human 48S. **B-C)** Fourier shell correlation (FSC) curve and local resolution of the 48S after multi-body refinement. **D-E)** Fourier shell correlation (FSC) curve and local resolution of the 48S after 3D focus classification on eIF4F and multi-body refinement.

48S without BS3 (24848 particles)

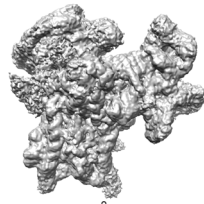

3.7Å

9.2Å

3D Focus classification and refine (2895 particles)  
11.7% of total 48S particles

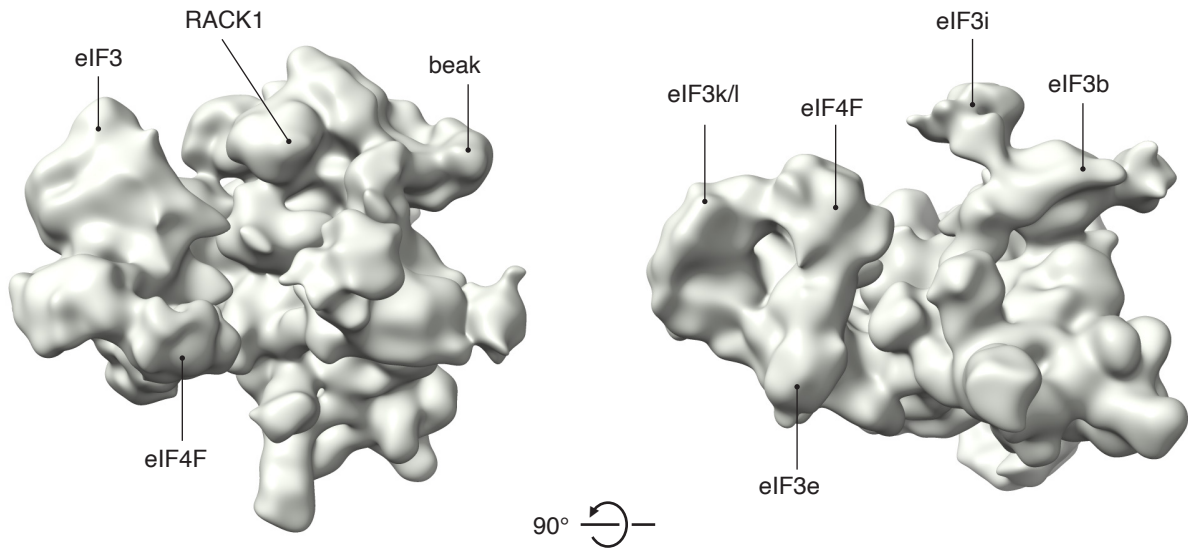

**Figure S4: Cryo-EM reconstruction of human 48S obtained without BS3 crosslinking.** 3D focus classification and refinement is shown for the 48S. Labels are shown for major regions of the 48S. eIF4F density is observed in the same location described in the sample stabilized with BS3 crosslinker.

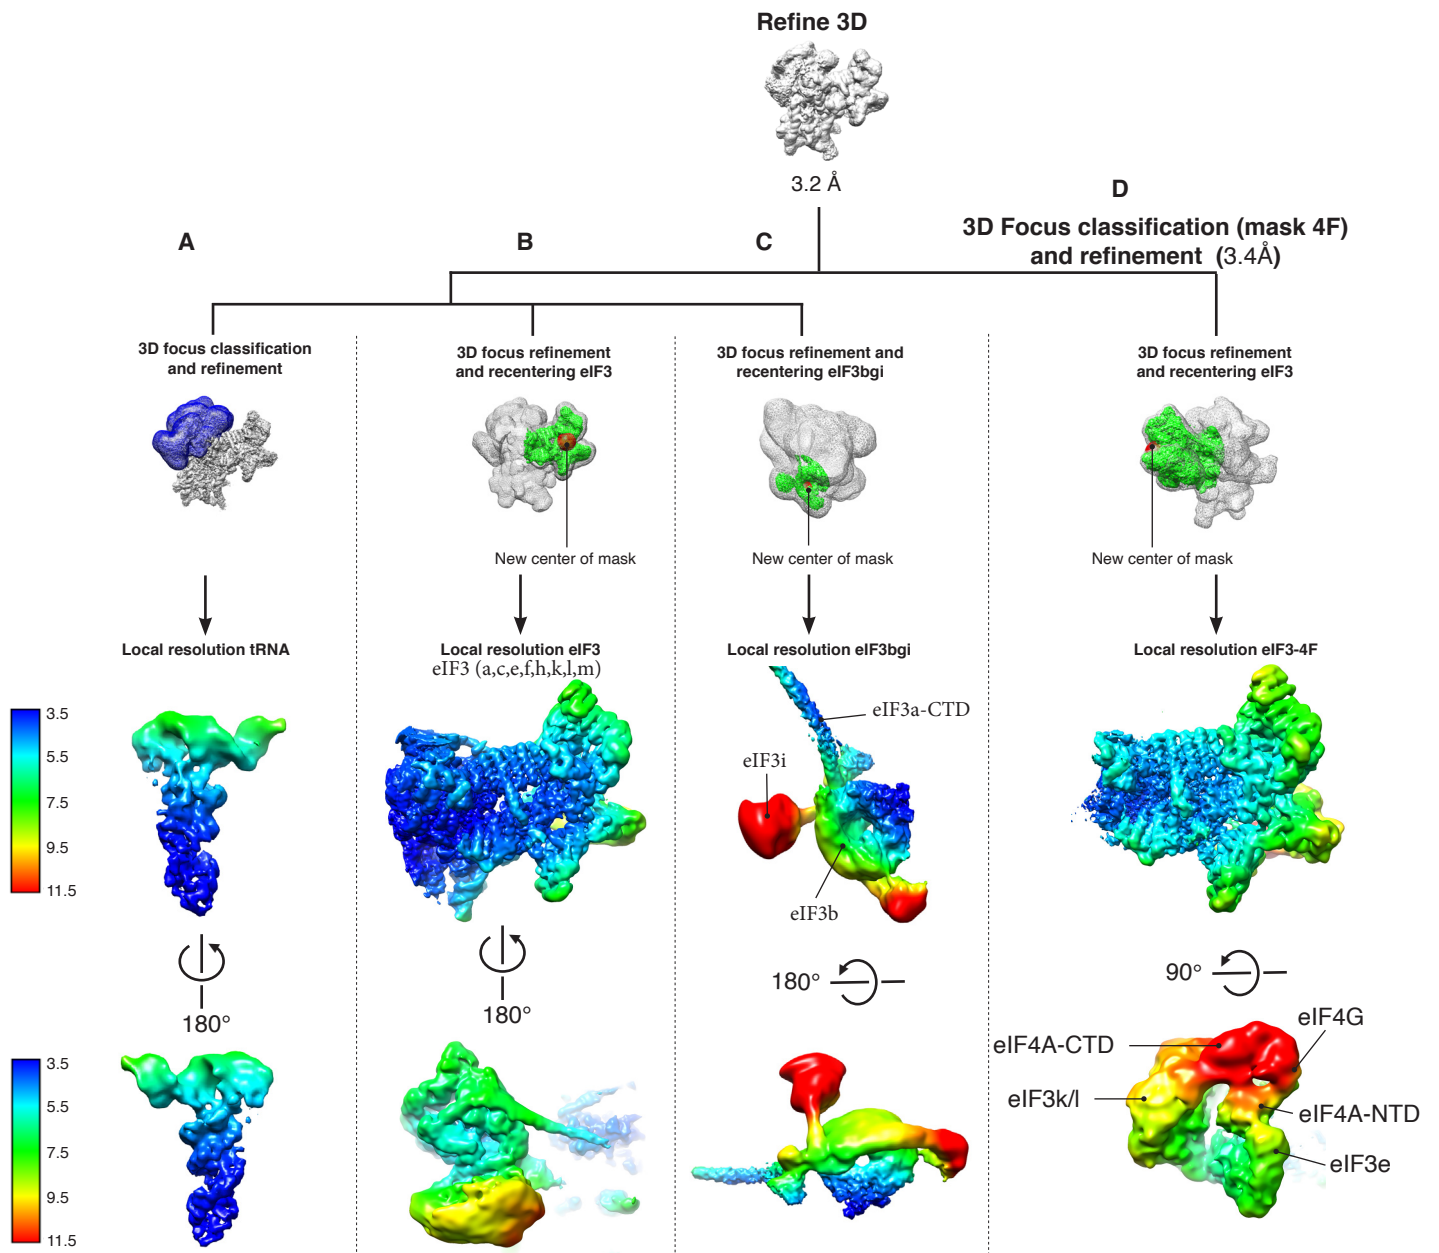

**Figure S5: Analysis of highly dynamic regions of the 48S.** 3D focus classification and focus refinements are shown for the head and eIF2-TC (A), the eIF3 structural core (B), the eIF3bgi subcomplex (C), and the eIF3-eIF4F interaction.

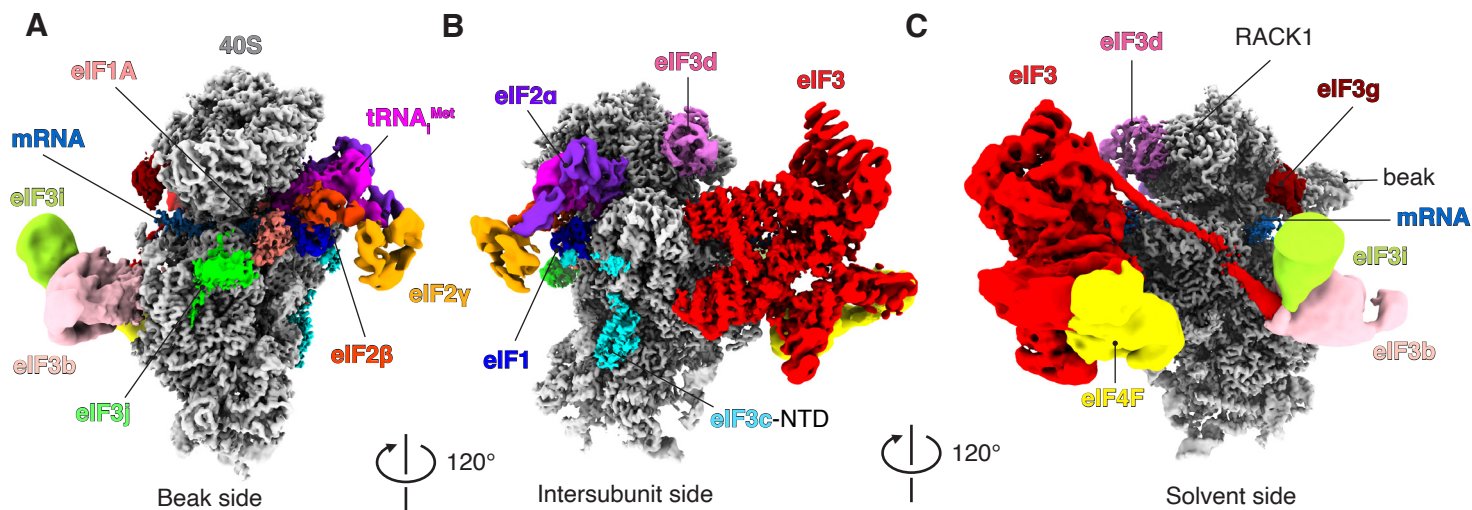

**Figure S6: Cryo-EM reconstruction of human 48S.** A-C) Segmented map filtered at local resolution. The segmented map is shown in three different orientations, as labelled. 40S is coloured in light-grey, eIF3 octameric structural core in red and eIF4F in yellow. Other 48S components are labelled accordingly.

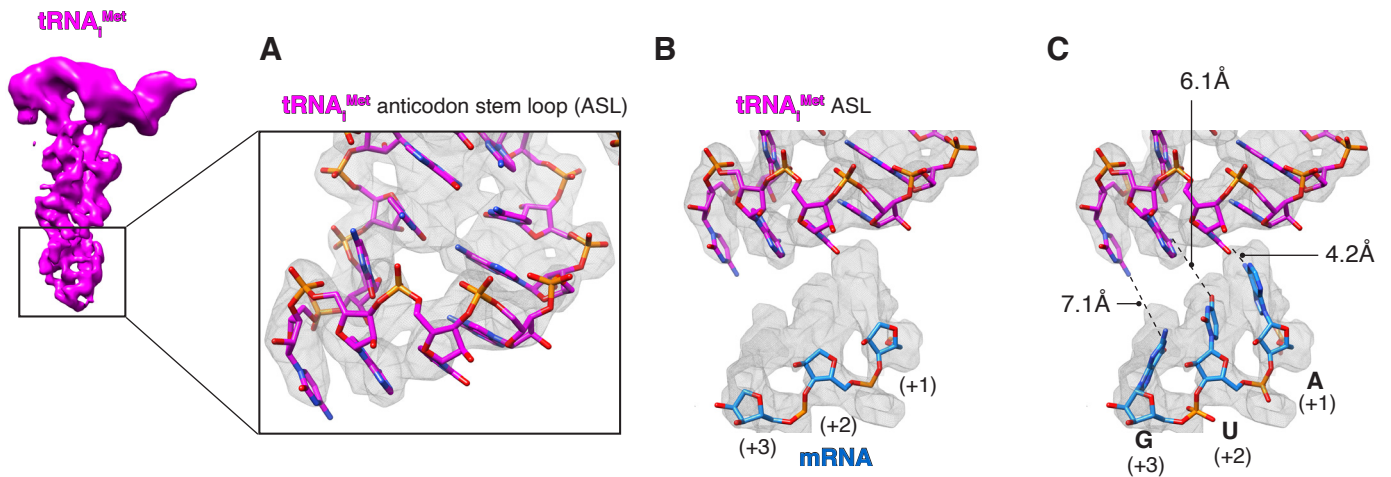

**Figure S7: Views of the tRNA in the cryo-EM map. A)** Map-to-model fits of  $tRNA_{Met}$  anticodon stem loop (ASL). **B)** Close-up view of the P site to highlight the position of the anticodon and the unassigned density for the mRNA bases. The distribution of the mRNA is heterogeneous, so only the sugar phosphate backbone is modeled. **C)** Modelling of bases for an AUG codon into the P site density shows that the distance between the bases are not compatible with hydrogen bond distances required for base pairing. It is important to highlight that the 48S structure was obtained using an mRNA lacking the start site.

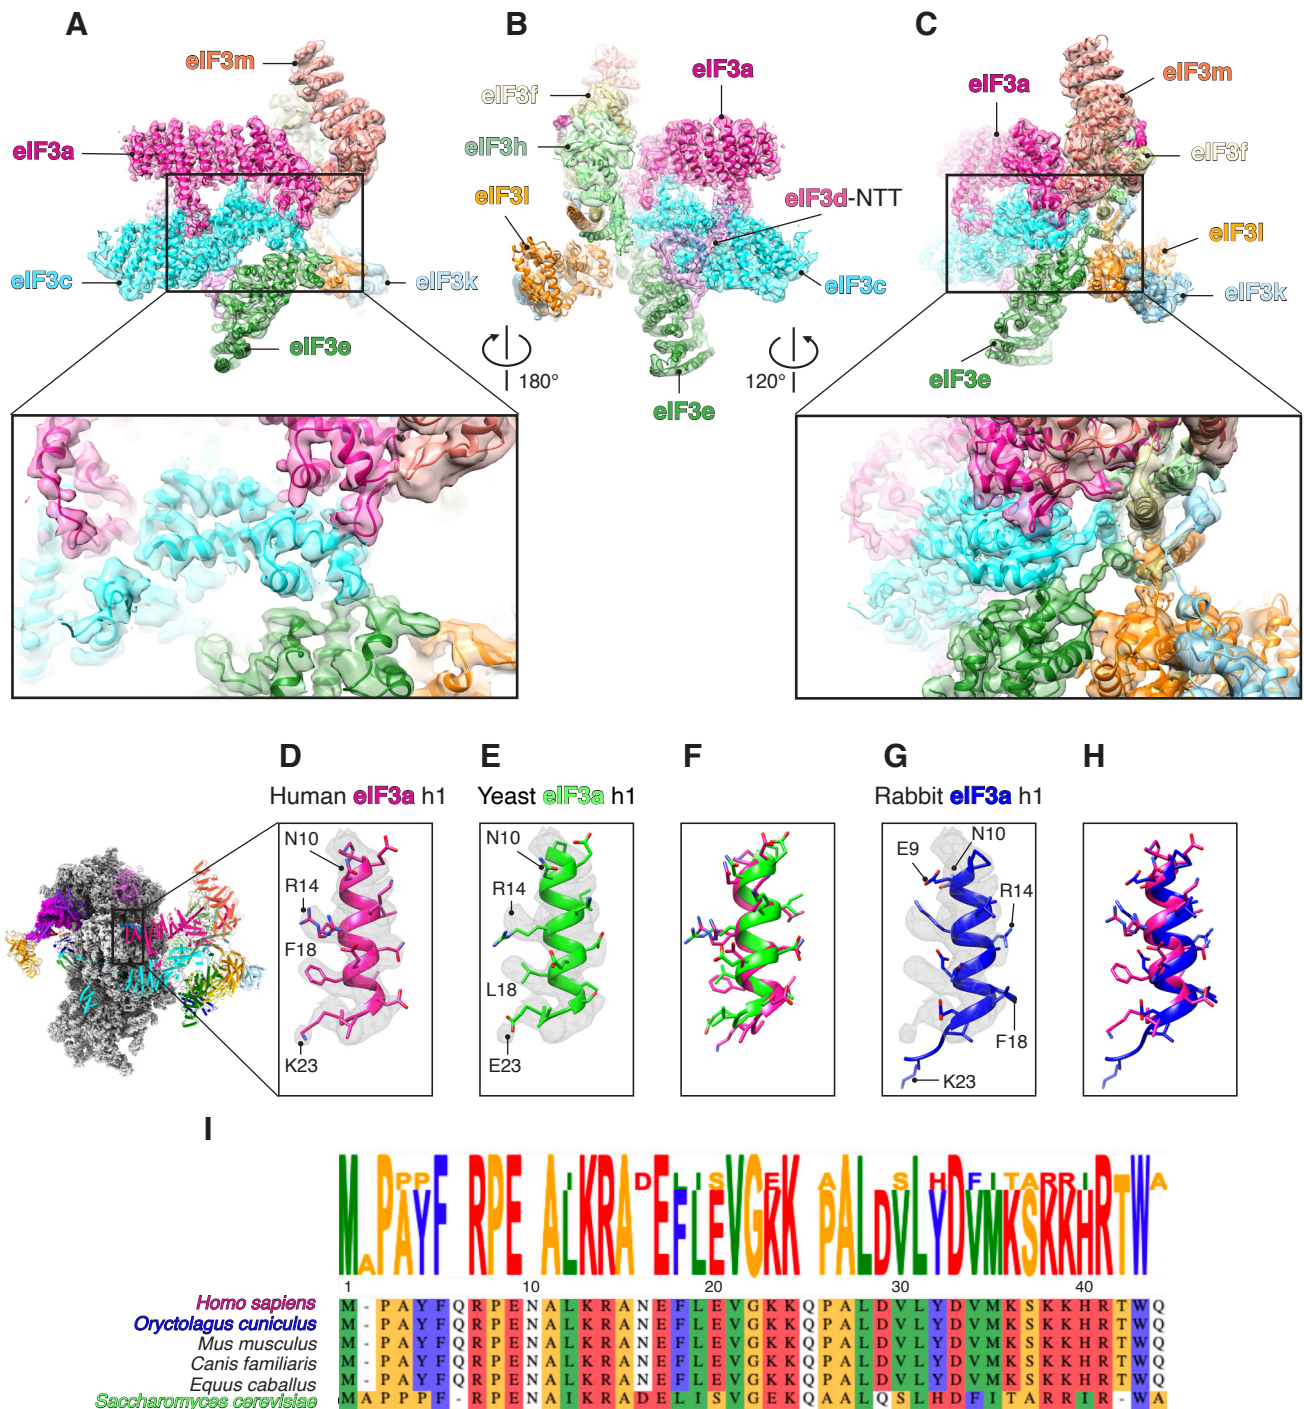

**Figure S8: Structure of human eIF3 octameric structural core.** **A-C)** Map-to-model fits of eIF3 octameric structural core to highlight the internal organization. **D)** Map-to-model fits of eIF3a helix 1 involved in the interaction with ribosomal protein eS1. **E)** Rigid-body fitting of yeast (*S. cerevisiae*) crystal structure of eIF3a helix 1 (19) into human cryo-EM map. **F)** Superposition of eIF3a structures shows structural conservation between human and yeast. **G)** Rigid-body fitting of a structure of rabbit eIF3a helix 1 (10) into human cryo-EM map. **H)** Superposition of eIF3a structures reveals the differences between human and low-resolution structure of rabbit eIF3a. In rabbit, all residues involved in the interaction with ribosomal protein eS1 are placed between 90° to 180° away from the human structure. **I)** Multiple sequence alignment of eIF3a N-terminal domain highlighting evolutionary conservation. The region involved in the interaction with ribosomal protein eS1 is 100% conserved in mammals. Low resolution data can explain the structural differences between human and rabbit eIF3a.

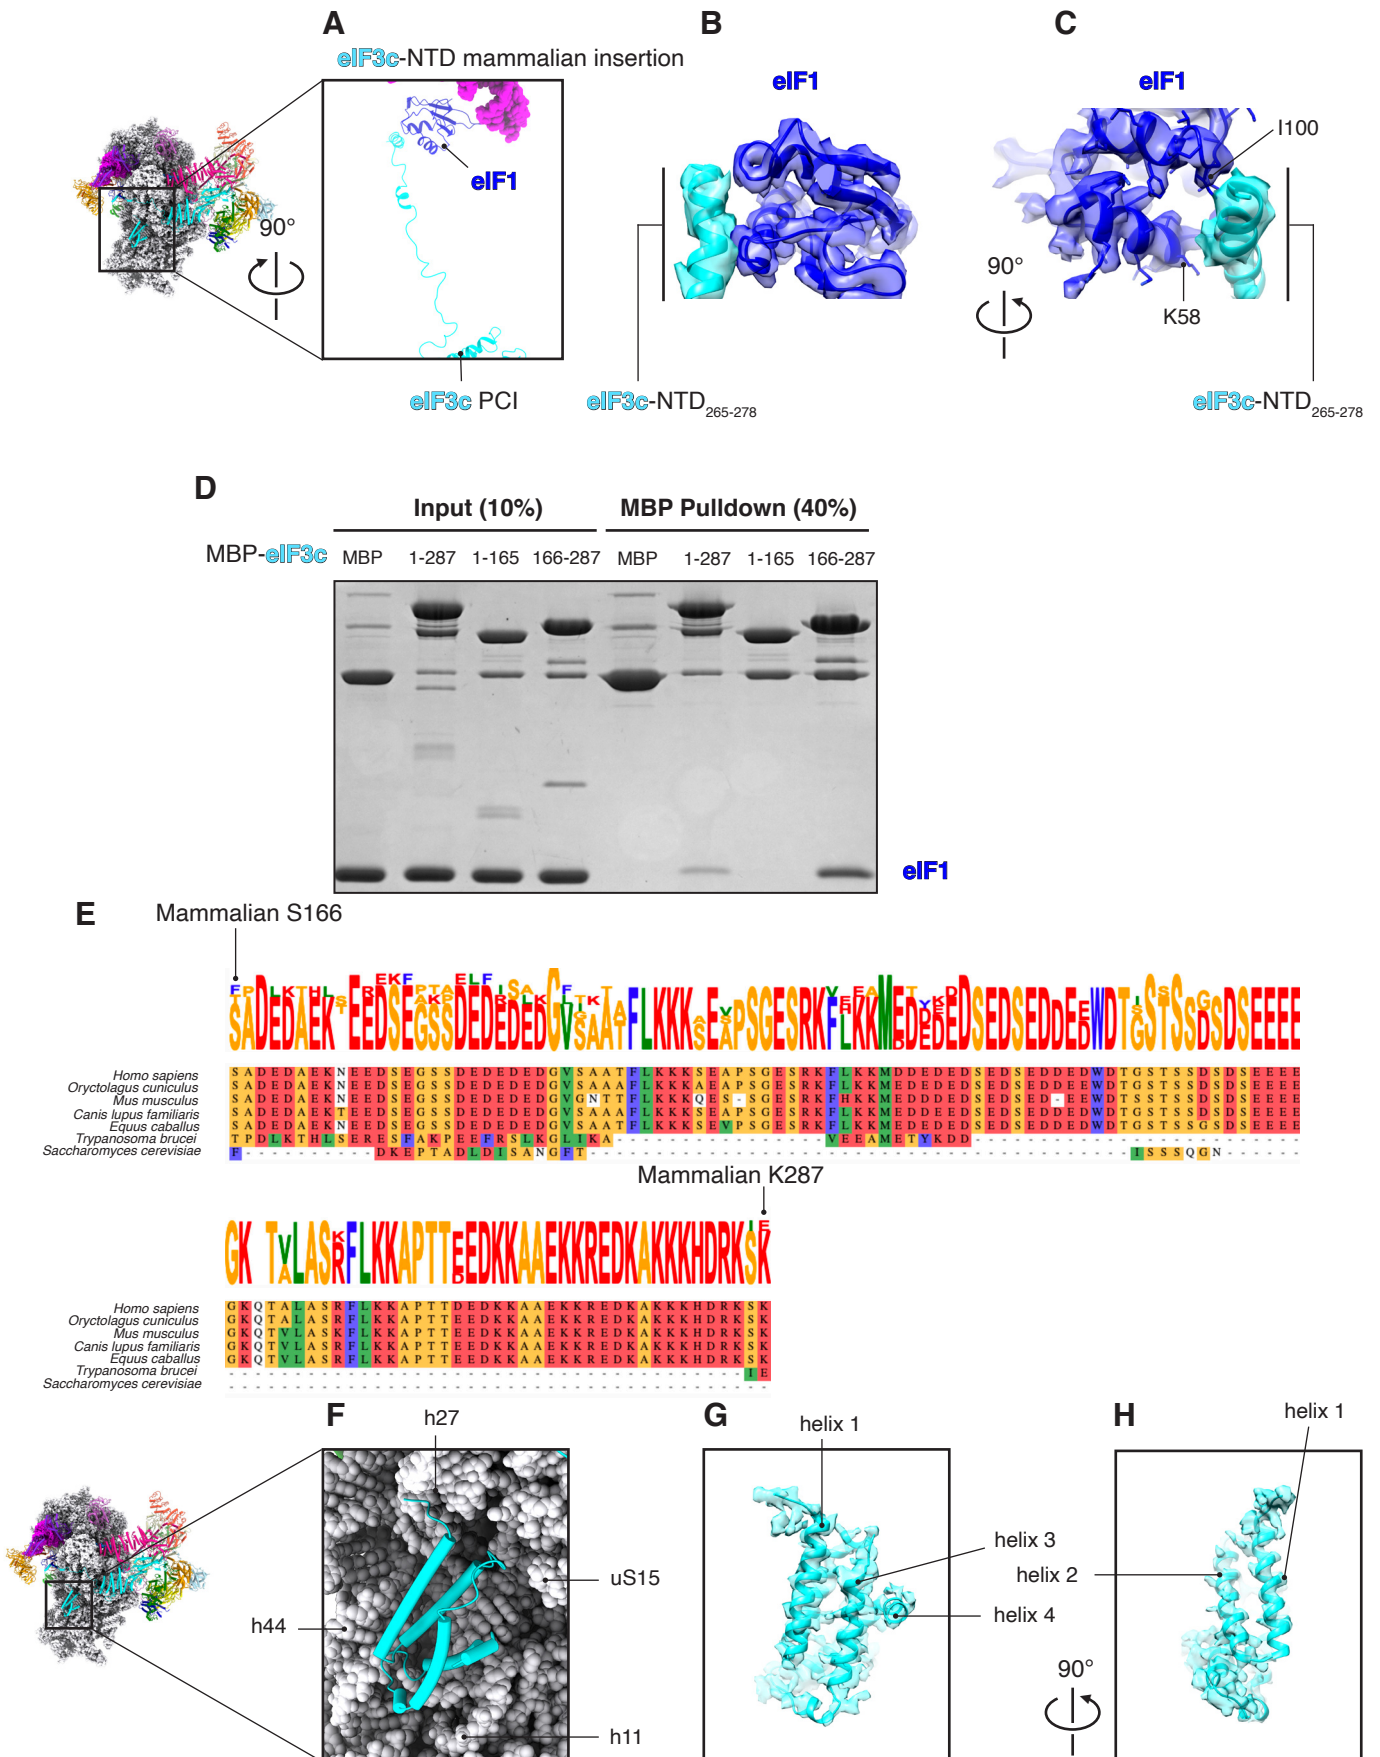

**Figure S9: Interaction of human eIF3c N-terminal domain with 40S and eIF1.** **A)** A mammalian conserved sequence insertion within eIF3c N-terminal domain extends from the eIF3 core towards the platform of the 40S where it interacts with eIF1 (**B**, **C**). **D)** Immunoprecipitation of purified human eIF1 by purified maltose binding protein (MBP)-tagged eIF3c-NTD was carried out as described in materials and methods. eIF1 co-immunoprecipitates with eIF3c truncations that include the mammalian conserved insertion (eIF3c1-287 and eIF3c166-287). **E)** Multiple sequence alignment of the eIF3c N-terminal domain from different species. The mammalian conserved insertion is shown for residues 166-287. **F-H)** eIF3c-NTD cluster of helices (eIF3c<sub>48-148</sub>) binds in a pocket formed by 18S rRNA h11, h27, h44 and r-protein uS15.

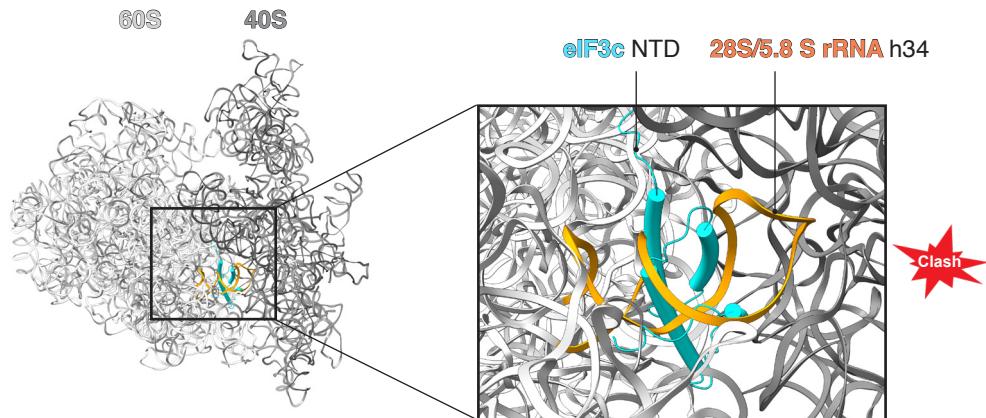

**Figure S10: Superposition of eIF3c-NTD with human 80S ribosome.** Superposition of the eIF3c-NTD cluster of four helices (eIF3c<sub>48-148</sub>) with the structure of human 80S (65). The eIF3c-NTD would clash with rRNA h34 from the large subunit, which is known to form a bridge contact between ribosomal subunits.



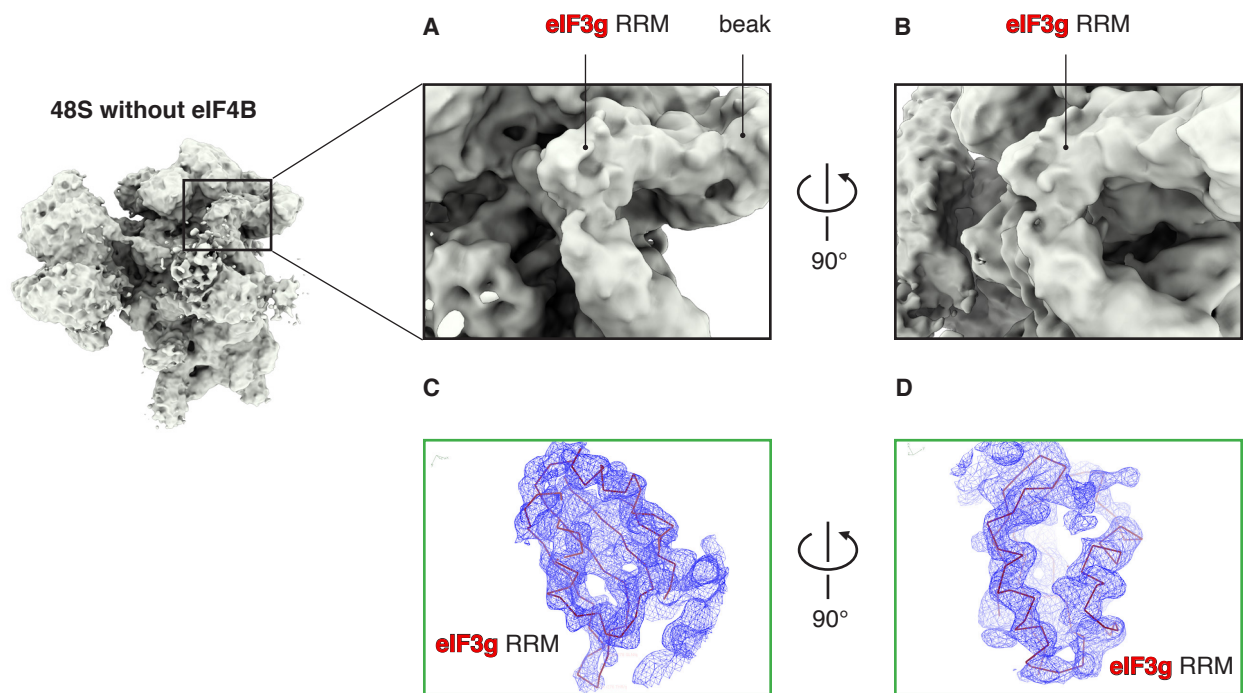

**Figure S11: Cryo-EM reconstruction of human 48S assembled in the absence of eIF4B. A-B)** Structure of eIF3g-RRM in a 48S assembled without eIF4B shown in two different views. **C-D)** Map-to-model fits of eIF3g-RRM.

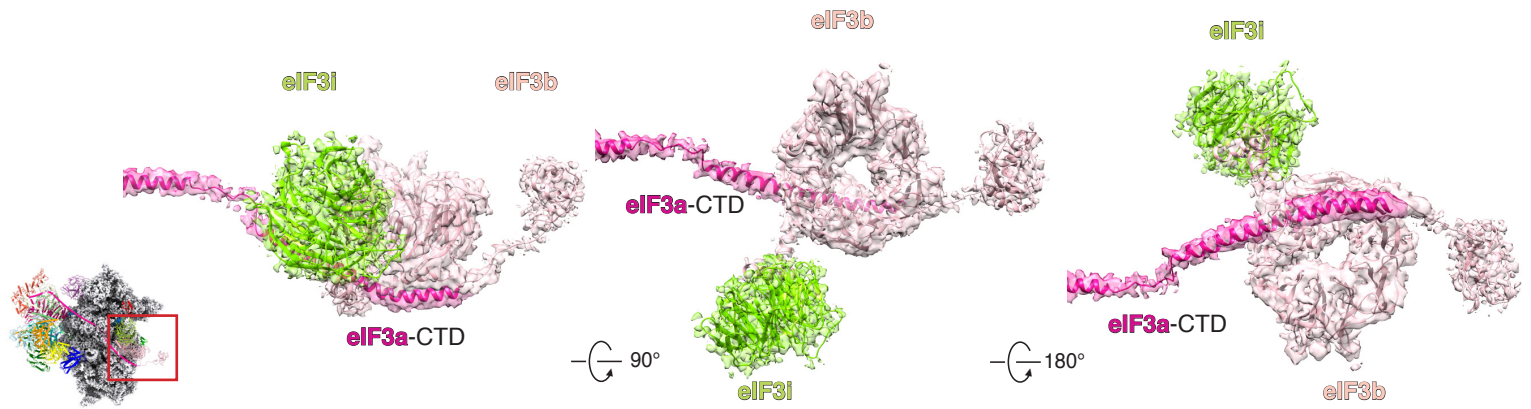

**Figure S12: Structure of eIF3bgi subcomplex. A)** Fits of eIF3bgi into the cryo-EM map. The structure of eIF3b and eIF3i were generated using the crystal structure of yeast eIF3bi (19). The polyalanine model of eIF3a-CTD was generated using secondary-structure prediction provided by PSIPRED.

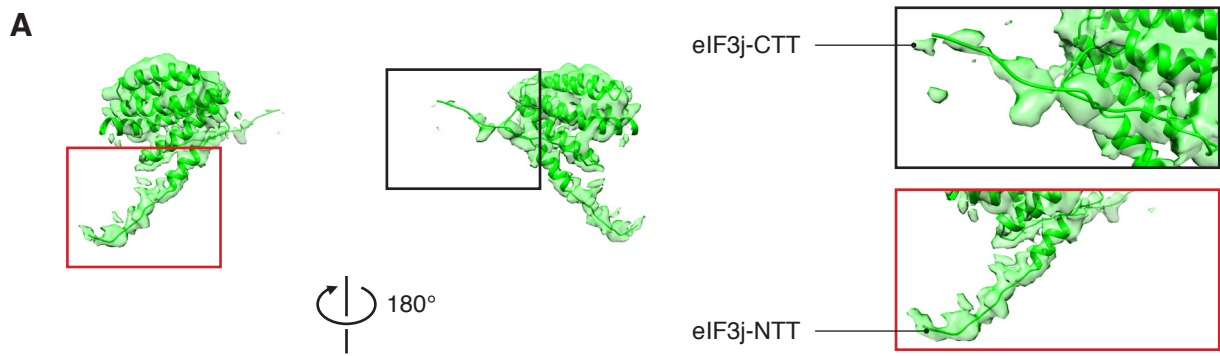

**B**

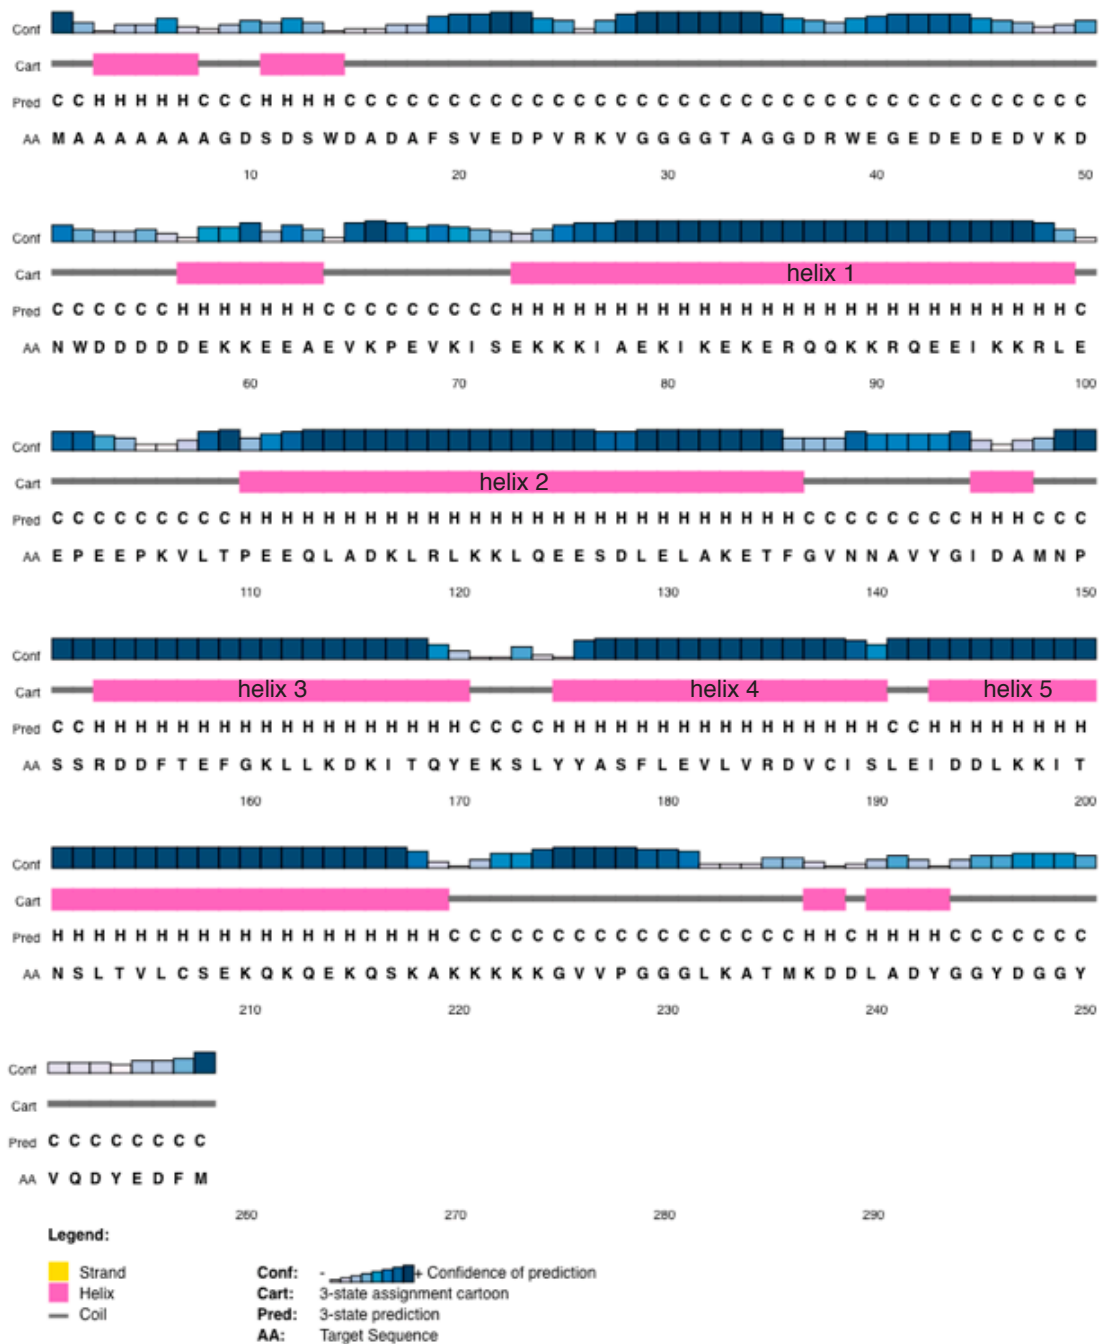

**Figure S13: Structure of eIF3j.** **A)** Fits of eIF3j into the cryo-EM map filtered at local resolution (4-9Å). The polyaniline model was generated using the crystal structure of human eIF3j (PDB:3BPJ) (helix 3-5) and secondary-structure prediction (helix 1-2) provided by PSIPRED (**B**).

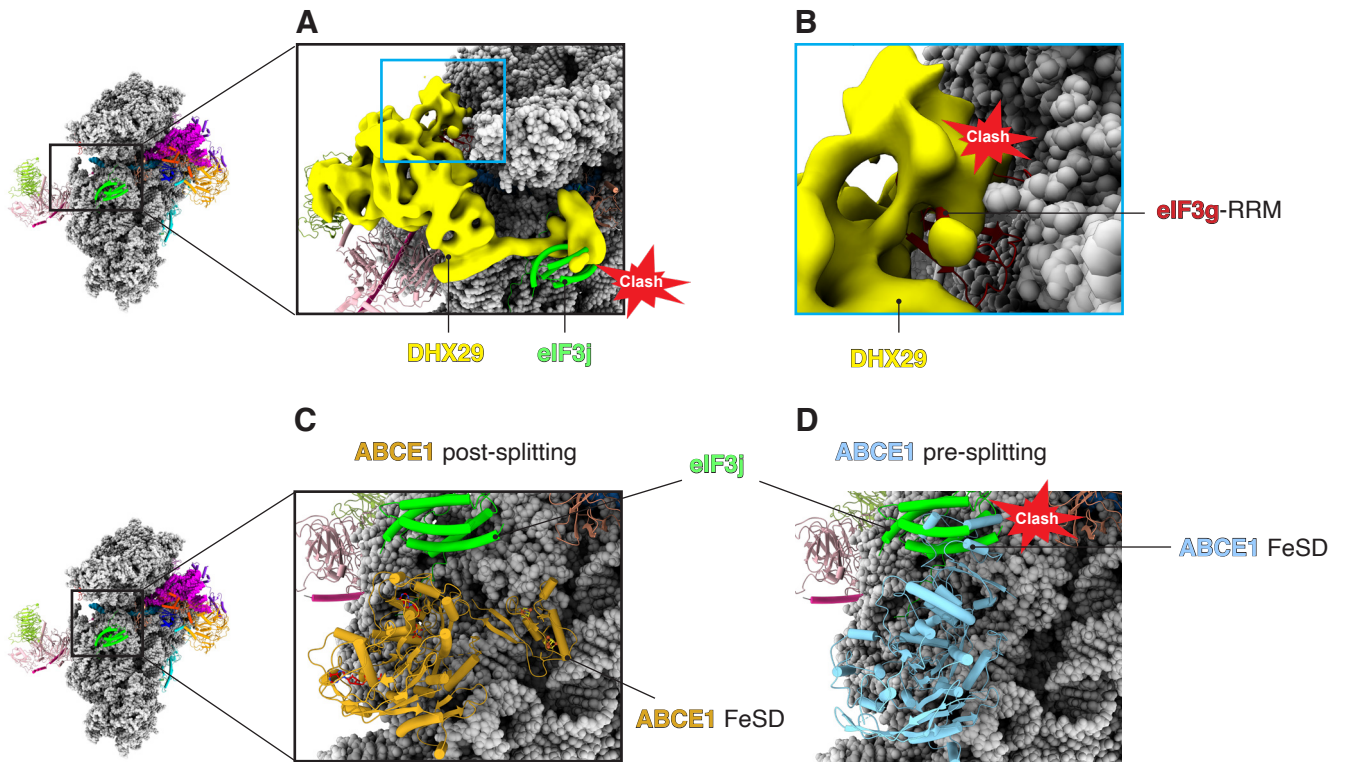

**Figure S14: Superposition of eIF3j with the structure of ABCE1.** **A)** Superposition of eIF3j in the 48S with the structure of DHX29 bound to the 43S PIC (10). The position of DHX29 clashes with eIF3j as well as with the eIF3g-RRM (**B**). **C)** Superposition of eIF3j in the 48S with the “post-splitting” structure of ABCE1 bound to the 40S subunit (29). **D)** Superposition of eIF3j with the “pre-splitting” structure of ABCE1 bound to the 80S ribosome (71-72). A predicted steric clash between eIF3j and the iron-sulfur cluster domain (FeSD) in ABCE1 is labelled.

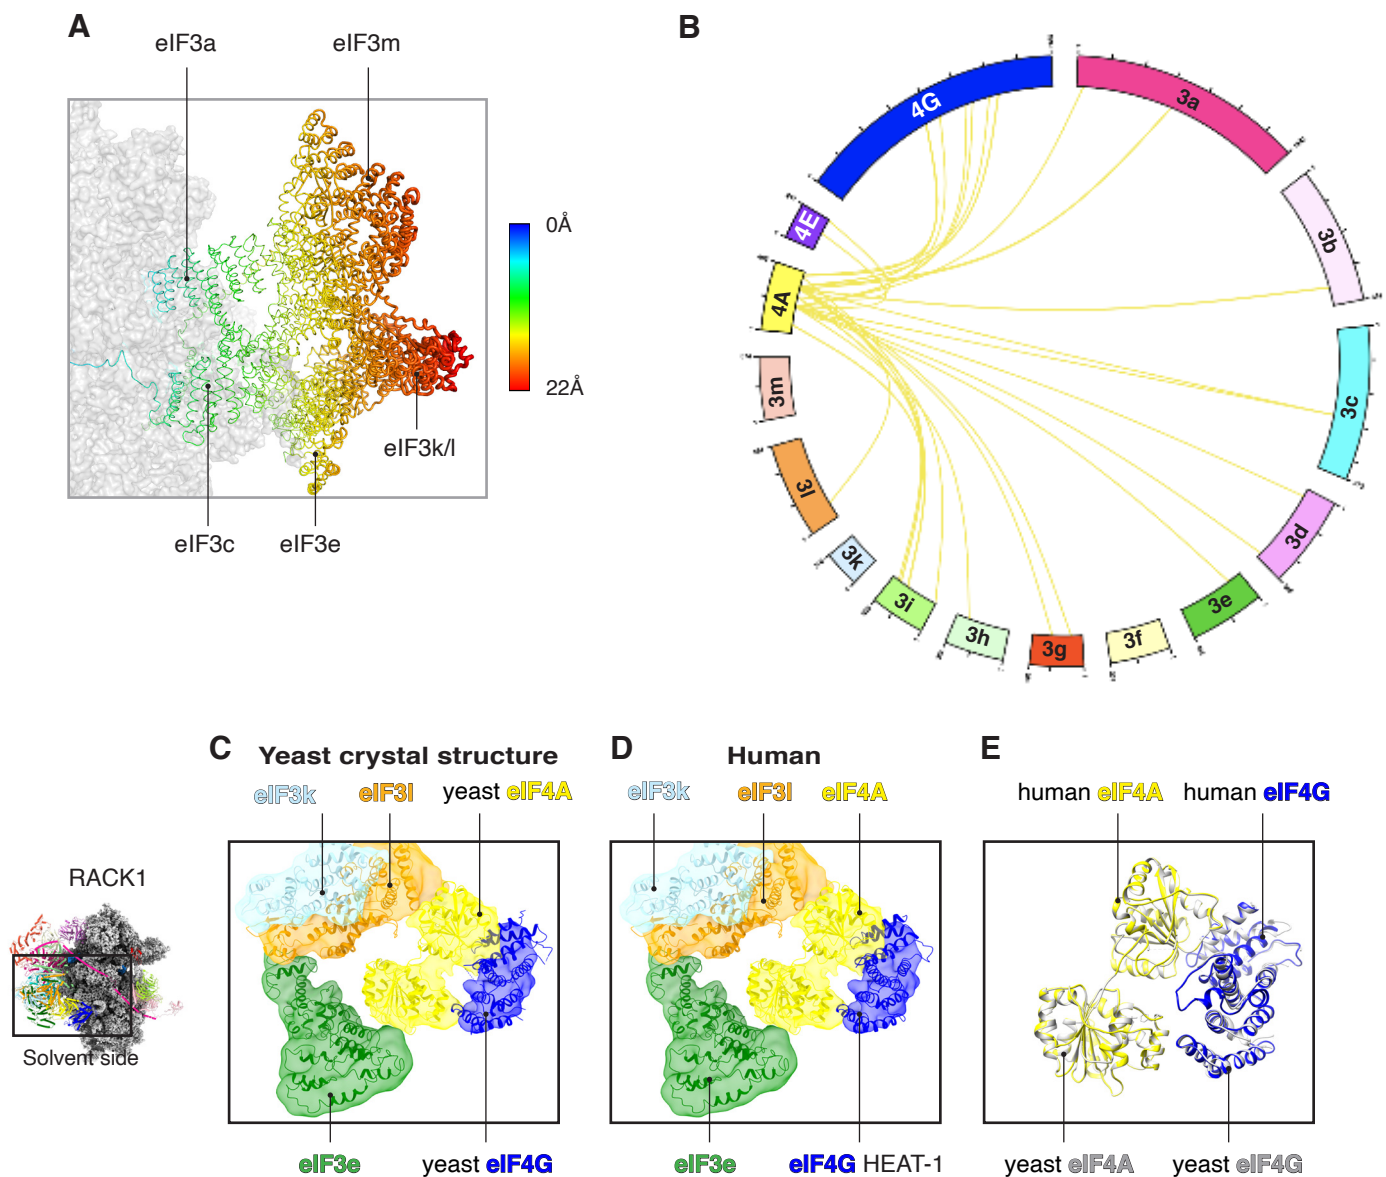

**Figure S15: eIF4F binding to the eIF3 complex.** **A)** Multi-body refinement and principal component were used to analyse the flexibility of eIF3 octameric structural core by measuring the relative positions of eIF3 and 40S. The eIF3k/l subunits are the most flexible region. **B)** A summary of crosslinking mass spectrometry of the eIF4F-eIF3 complex (match score: min 180; max 230), as described in materials and methods. Connecting lines between eIF4A and other proteins reflect the number of crosslinks observed. The majority of crosslinks are observed between eIF4A and the eIF3 structural core. **C)** Rigid-body fitting (correlation = 0.92) of *S. cerevisiae* crystal structure (31) into human cryo-EM map to local resolution (6-11 Å). Yeast crystal structure (eIF4A seq Identity 67.40%; eIF4G-HEAT1 seq Identity 34.98%) was used for the homology model of human eIF4A-eIF4G. **D)** Rigid-body fitting of human homology model into the cryo-EM map. **E)** Superposition of human and yeast eIF4F.

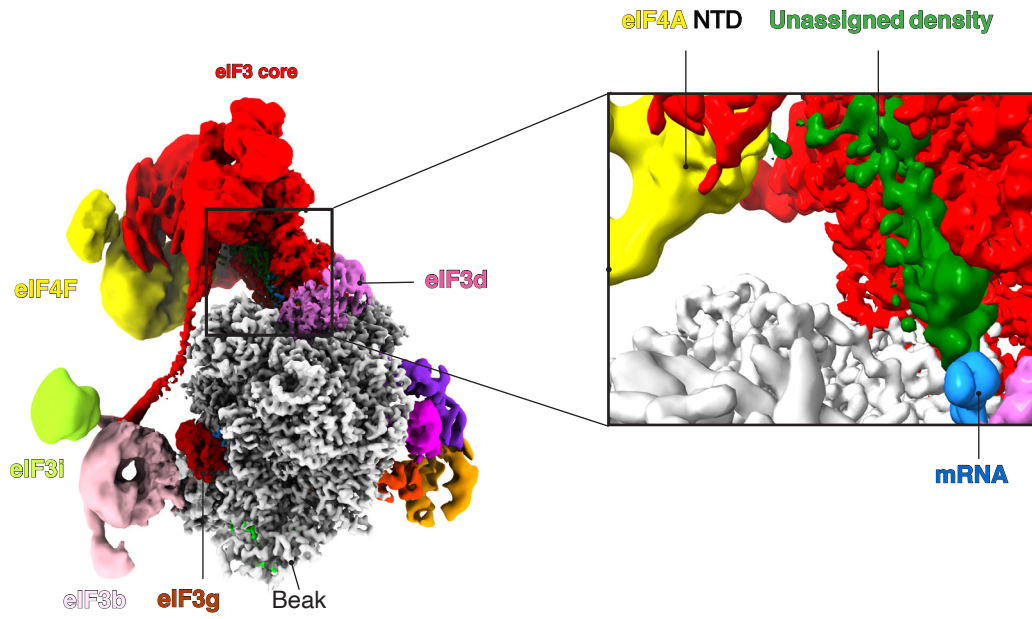

**Figure S16: Cryo-EM reconstruction of human 48S.** An unassigned density connects the mRNA (-14) with eIF4A.

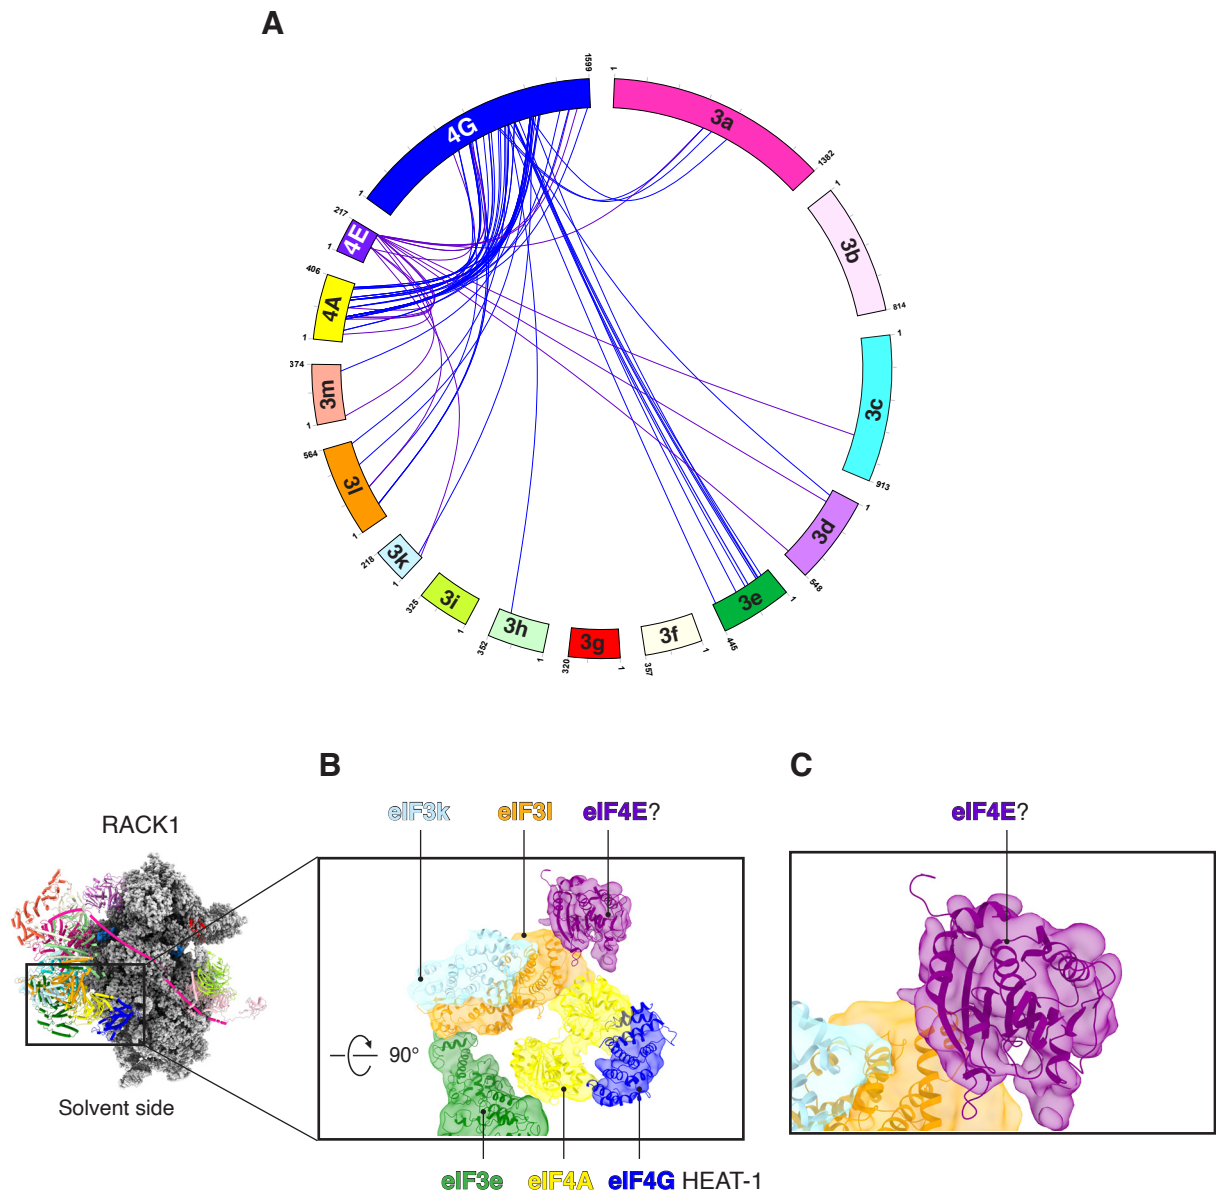

**Figure S17: Fitting and density assignment to eIF4E.** **A)** Crosslinking mass spectrometry of eIF4F-eIF3 complex revealed the interaction of eIF4E and eIF4G with the eIF3 structural core (match score: min 90; max 230), as described in materials and methods. **B-C)** Additional unassigned density is shown in proximity to the density we have assigned to eIF4A-eIF4G. Rigid-body fitting (correlation = 0.70) of the human crystal structure of eIF4E (73) into the unassigned density.

**Table S1: Data collection, processing, refinement and model statistics.**

| <b>Data Collection</b>                                                    |                          |             |             |           |                |            |
|---------------------------------------------------------------------------|--------------------------|-------------|-------------|-----------|----------------|------------|
| Microscope                                                                | Titan Krios              |             |             |           |                |            |
| Voltage (kV)                                                              | 300                      |             |             |           |                |            |
| Corrected Magnification                                                   | 129,000                  |             |             |           |                |            |
| Pixel size (Å)                                                            | 1.074                    |             |             |           |                |            |
| Detector                                                                  | Falcon III               |             |             |           |                |            |
| Defocus range (µm)                                                        | -1.8 to -3.0             |             |             |           |                |            |
| Defocus mean (µm)                                                         | -2.4                     |             |             |           |                |            |
| Total electron exposure (e <sup>-</sup> Å <sup>-2</sup> s <sup>-1</sup> ) | 107                      |             |             |           |                |            |
| Exposure rate (e <sup>-</sup> Å <sup>-2</sup> frame <sup>-1</sup> )       | 2.74                     |             |             |           |                |            |
| Data collection software                                                  | EPU                      |             |             |           |                |            |
| <b>Data Processing</b>                                                    |                          |             |             |           |                |            |
| Independent data collections                                              | 2                        |             |             |           |                |            |
| Useable micrographs                                                       | 10,604                   |             |             |           |                |            |
| Particles                                                                 | 718,874                  |             |             |           |                |            |
| Final particles (48S)                                                     | 128,373                  |             |             |           |                |            |
| Map sharpening B-factor (Å <sup>2</sup> )                                 | -10                      |             |             |           |                |            |
| Accuracy                                                                  |                          |             |             |           |                |            |
| translations (pix) / rotations (°)                                        | 0.39 / 0.46°             |             |             |           |                |            |
| Resolution (Å)                                                            |                          |             |             |           |                |            |
| Unmasked (0.143 FSC)                                                      | 4.20                     |             |             |           |                |            |
| Masked (0.143 FSC)                                                        | 3.08                     |             |             |           |                |            |
| Local resolution range (Å)                                                | 11-2.8                   |             |             |           |                |            |
| Model                                                                     | <b>body</b>              | <b>head</b> | <b>eIF3</b> | <b>TC</b> | <b>eIF3bgi</b> | <b>48S</b> |
| EMDB accession code                                                       | 10775                    | 10772       | 10769       | 10774     | 10773          | 11302      |
| PDB accession code                                                        | 6YBW                     | 6YBS        | 6YBD        | 6YBV      | 6YBT           | 6ZMW       |
| <b>Model Composition</b>                                                  |                          |             |             |           |                |            |
| Chains                                                                    | 29                       | 18          | 19          | 5         | 3              | 57         |
| Non-hydrogen atoms                                                        | 52908                    | 28732       | 30742       | 6731      | 5426           | 118158     |
| Protein residues                                                          | 3374                     | 2330        | 4421        | 769       | 1026           | 11116      |
| RNA bases                                                                 | 1254                     | 501         | 0           | 78        | 0              | 1822       |
| <b>Refinement</b>                                                         |                          |             |             |           |                |            |
| Software                                                                  | phenix.real_space_refine |             |             |           |                |            |
| Resolution (Å)                                                            | 3.1                      | 3.1         | 3.3         | 3.8       | 6.0            | 3.7        |
| CC (mask)                                                                 | 0.87                     | 0.87        | 0.74        | 0.55      | 0.43           | 0.60       |
| CC (main chain)                                                           | 0.85                     | 0.85        | 0.71        | 0.49      | 0.48           | 0.54       |
| CC (side chain)                                                           | 0.86                     | 0.86        | 0.75        | 0.60      | 0.43           | 0.66       |
| Average B factors (Å <sup>2</sup> )                                       |                          |             |             |           |                |            |
| Protein                                                                   | 79.36                    | 87.85       | 53.97       | 72.44     | 61.69          | 108.72     |
| Nucleotides                                                               | 91.66                    | 66.40       |             | 47.19     |                | 84.41      |
| <b>R.M.S deviations</b>                                                   |                          |             |             |           |                |            |
| Bond lengths (Å)                                                          | 0.005                    | 0.006       | 0.013       | 0.009     | 0.007          | 0.007      |
| Bond angles (°)                                                           | 0.970                    | 1.118       | 1.466       | 1.614     | 1.531          | 1.367      |
| <b>Validation</b>                                                         |                          |             |             |           |                |            |
| Molprobtity score                                                         | 1.87                     | 1.87        | 1.90        | 2.56      | 1.71           | 2.12       |
| Clashscore, all atoms                                                     | 4.26                     | 3.61        | 6.80        | 9.58      | 5.29           | 7.26       |
| Rotamers outliers (%)                                                     | 3.26                     | 2.92        | 0.40        | 6.67      | 0.00           | 2.37       |
| Cβ outliers (%)                                                           | 0.00                     | 0.00        | 0.00        | 0.00      | 0.00           | 0.00       |
| CaBLAM outliers (%)                                                       | 2.01                     | 3.11        | 4.48        | 2.56      | 4.67           | 3.30       |
| <b>Ramachandran plot</b>                                                  |                          |             |             |           |                |            |
| Favored (%)                                                               | 95.98                    | 93.98       | 90.70       | 93.38     | 93.50          | 93.29      |
| Allowed (%)                                                               | 3.93                     | 5.28        | 9.18        | 6.09      | 5.81           | 6.49       |
| Outliers (%)                                                              | 0.090                    | 0.00        | 0.11        | 0.53      | 0.69           | 0.23       |



**Table S2: Protein-protein and protein-rRNA interaction table.**

| Protein 1/rRNA |       | Protein 2/rRNA |                           |
|----------------|-------|----------------|---------------------------|
| eIF3a          | Q6    | E78            | eS1                       |
|                | N10   | E78            |                           |
|                | R14-a | E78            |                           |
|                | R14-b | D77            |                           |
| eIF3a          | K23   | S192           | eS26                      |
|                | Q6    | A61            |                           |
| eIF3a          | R7    | D60            | 18S rRNA/ES7 <sup>s</sup> |
|                | K63   | C1116          |                           |
| eIF3a          | E135  | H465           | eIF3c                     |
|                | T137  | Q467           |                           |
|                | R140  | Q467           |                           |
|                | R140  | P464           |                           |
|                | R140  | H465           |                           |
|                | R143  | D463           |                           |
|                | S286  | L727           |                           |
|                | D343  | K745           |                           |
|                | D345  | R719           |                           |
|                | R469  | D748           |                           |
|                | R476  | T794           |                           |
|                | R483  | D800           |                           |
|                | R483  | V798           |                           |
|                | I484  | V798           |                           |
|                | H486  | S801           |                           |
| H486           | S803  |                |                           |
| T487           | S801  |                |                           |
| R489           | S803  |                |                           |
| eIF3a          | N399  | R317           | eIF3m                     |
|                | I446  | K324           |                           |
|                | Q448  | K324           |                           |
|                | S449  | K324           |                           |
|                | S449  | D326           |                           |
| eIF3c          | E517  | K331           | 18S rRNA                  |
|                | K432  | G928           |                           |
| eIF3c          | K343  | G929           | eS27                      |
|                | R340  | S60            |                           |
| eIF3c          | L389  | E75            | eIF3e                     |
|                | D602  | Y41            |                           |
| eIF3c          | T583  | Q283           | eIF3c                     |
|                | R586  | V280           |                           |
|                | R586  | E284           |                           |
|                | R586  | E284           |                           |
|                | D587  | N244           |                           |
|                | S834  | I347           |                           |
|                | D834  | Q349           |                           |
| D836           | Q349  |                |                           |
| eIF3d-NTT      | A41   | T609           | eIF3c                     |
|                | A43   | N610           |                           |
|                | D44   | R641           |                           |
|                | W45   | Q606           |                           |
|                | T46   | R641           |                           |
|                | Q68   | N597           |                           |
|                | Y69   | T566           |                           |
|                | A70   | D562           |                           |
| Y71            | T566  |                |                           |
| H73            | H600  |                |                           |
| eIF3g-RRM      | N245  | T55            | uS3                       |
|                | H307  | A88            |                           |
|                | H307  | L86            |                           |
|                | I309  | A88            |                           |
| eIF3b          | Q553  | H156           | uS4                       |
|                | F510  | G118           |                           |
|                | V556  | K155           |                           |
|                | R505  | K155           |                           |
|                | R507  | I157           |                           |
| R492           | G166  |                |                           |
| eIF3c-NTD      | N131  | G1732          | 18S rRNA                  |
|                | K123  | U1730          |                           |
|                | S139  | U367-368       |                           |
|                | Q143  | U367           |                           |
| R146           | U393  |                |                           |

**Table S3. Summary of fluorescent data and Kd values for eIF4A binding to eIF3.**

<sup>a</sup>Equilibrium dissociation constants determined by titration with eIF3 under the experimental condition.

<sup>b</sup>Anisotropy of the fluorescent labeled molecule prior to addition of eIF3 under the experimental condition.

<sup>c</sup>Calculated anisotropy of the fluorescent labeled molecule in the eIF3 bound state under the experimental condition.

<sup>d</sup>Difference between  $r_{free}$  and  $r_{bound}$ , representing the maximum anisotropy change under the experimental condition.

|            | $K_d$ (nM) <sup>a</sup> | $r_{free}$ <sup>b</sup> | $r_{bound}$ <sup>c</sup> | $\Delta r_{max}$ <sup>d</sup> |
|------------|-------------------------|-------------------------|--------------------------|-------------------------------|
| eIF3       | ~400 <sup>c</sup>       | 0.146 ± 0.001           | 0.187 ± 0.002            | 0.041 ± 0.002                 |
| eIF3+eIF4G | 126 ± 9                 | 0.168 ± 0.0001          | 0.186 ± 0.0003           | 0.017 ± 0.0002                |

**Movie S1: Key features of the human 48S translation initiation complex.**

## References and Notes

1. J. A. Grifo, S. M. Tahara, M. A. Morgan, A. J. Shatkin, W. C. Merrick, New initiation factor activity required for globin mRNA translation. *J. Biol. Chem.* **258**, 5804–5810 (1983). [Medline](#)
2. S. Morino, H. Imataka, Y. V. Svitkin, T. V. Pestova, N. Sonenberg, Eukaryotic translation initiation factor 4E (eIF4E) binding site and the middle one-third of eIF4GI constitute the core domain for cap-dependent translation, and the C-terminal one-third functions as a modulatory region. *Mol. Cell. Biol.* **20**, 468–477 (2000). [doi:10.1128/MCB.20.2.468-477.2000](https://doi.org/10.1128/MCB.20.2.468-477.2000) [Medline](#)
3. A. Marintchev, K. A. Edmonds, B. Marintcheva, E. Hendrickson, M. Oberer, C. Suzuki, B. Herdy, N. Sonenberg, G. Wagner, Topology and regulation of the human eIF4A/4G/4H helicase complex in translation initiation. *Cell* **136**, 447–460 (2009). [doi:10.1016/j.cell.2009.01.014](https://doi.org/10.1016/j.cell.2009.01.014) [Medline](#)
4. N. Villa, A. Do, J. W. B. Hershey, C. S. Fraser, Human eukaryotic initiation factor 4G (eIF4G) protein binds to eIF3c, -d, and -e to promote mRNA recruitment to the ribosome. *J. Biol. Chem.* **288**, 32932–32940 (2013). [doi:10.1074/jbc.M113.517011](https://doi.org/10.1074/jbc.M113.517011) [Medline](#)
5. A. K. LeFebvre, N. L. Korneeva, M. Trutschl, U. Cvek, R. D. Duzan, C. A. Bradley, J. W. B. Hershey, R. E. Rhoads, Translation initiation factor eIF4G-1 binds to eIF3 through the eIF3e subunit. *J. Biol. Chem.* **281**, 22917–22932 (2006). [doi:10.1074/jbc.M605418200](https://doi.org/10.1074/jbc.M605418200) [Medline](#)
6. P. Kumar, C. U. T. Hellen, T. V. Pestova, Toward the mechanism of eIF4F-mediated ribosomal attachment to mammalian capped mRNAs. *Genes Dev.* **30**, 1573–1588 (2016). [doi:10.1101/gad.282418.116](https://doi.org/10.1101/gad.282418.116) [Medline](#)
7. E. Obayashi, R. E. Luna, T. Nagata, P. Martin-Marcos, H. Hiraishi, C. R. Singh, J. P. Erzberger, F. Zhang, H. Arthanari, J. Morris, R. Pellarin, C. Moore, I. Harmon, E. Papadopoulos, H. Yoshida, M. L. Nasr, S. Unzai, B. Thompson, E. Aube, S. Hustak, F. Stengel, E. Dagraca, A. Ananbandam, P. Gao, T. Urano, A. G. Hinnebusch, G. Wagner, K. Asano, Molecular landscape of the ribosome pre-initiation complex during mRNA scanning: Structural role for eIF3c and its control by eIF5. *Cell Rep.* **18**, 2651–2663 (2017). [doi:10.1016/j.celrep.2017.02.052](https://doi.org/10.1016/j.celrep.2017.02.052) [Medline](#)
8. L. Valásek, K. H. Nielsen, F. Zhang, C. A. Fekete, A. G. Hinnebusch, Interactions of eukaryotic translation initiation factor 3 (eIF3) subunit NIP1/c with eIF1 and eIF5 promote preinitiation complex assembly and regulate start codon selection. *Mol. Cell. Biol.* **24**, 9437–9455 (2004). [doi:10.1128/MCB.24.21.9437-9455.2004](https://doi.org/10.1128/MCB.24.21.9437-9455.2004) [Medline](#)
9. V. G. Kolupaeva, A. Unbehauen, I. B. Lomakin, C. U. T. Hellen, T. V. Pestova, Binding of eukaryotic initiation factor 3 to ribosomal 40S subunits and its role in ribosomal dissociation and anti-association. *RNA* **11**, 470–486 (2005). [doi:10.1261/rna.7215305](https://doi.org/10.1261/rna.7215305) [Medline](#)
10. A. des Georges, V. Dhote, L. Kuhn, C. U. T. Hellen, T. V. Pestova, J. Frank, Y. Hashem, Structure of mammalian eIF3 in the context of the 43S preinitiation complex. *Nature* **525**, 491–495 (2015). [doi:10.1038/nature14891](https://doi.org/10.1038/nature14891) [Medline](#)

11. D. Andreev, V. Hauryliuk, I. Terenin, S. Dmitriev, M. Ehrenberg, I. Shatsky, The bacterial toxin RelE induces specific mRNA cleavage in the A site of the eukaryote ribosome. *RNA* **14**, 233–239 (2008). [doi:10.1261/rna.693208](https://doi.org/10.1261/rna.693208) [Medline](#)
12. M. Sokabe, C. S. Fraser, A helicase-independent activity of eIF4A in promoting mRNA recruitment to the human ribosome. *Proc. Natl. Acad. Sci. U.S.A.* **114**, 6304–6309 (2017). [doi:10.1073/pnas.1620426114](https://doi.org/10.1073/pnas.1620426114) [Medline](#)
13. R. Toribio, I. Díaz-López, J. Boskovic, I. Ventoso, Translation initiation of alphavirus mRNA reveals new insights into the topology of the 48S initiation complex. *Nucleic Acids Res.* **46**, 4176–4187 (2018). [doi:10.1093/nar/gky071](https://doi.org/10.1093/nar/gky071) [Medline](#)
14. J. L. Llácer, T. Hussain, L. Marler, C. E. Aitken, A. Thakur, J. R. Lorsch, A. G. Hinnebusch, V. Ramakrishnan, Conformational Differences between Open and Closed States of the Eukaryotic Translation Initiation Complex. *Mol. Cell* **59**, 399–412 (2015). [doi:10.1016/j.molcel.2015.06.033](https://doi.org/10.1016/j.molcel.2015.06.033) [Medline](#)
15. T. Hussain, J. L. Llácer, I. S. Fernández, A. Munoz, P. Martin-Marcos, C. G. Savva, J. R. Lorsch, A. G. Hinnebusch, V. Ramakrishnan, Structural changes enable start codon recognition by the eukaryotic translation initiation complex. *Cell* **159**, 597–607 (2014). [doi:10.1016/j.cell.2014.10.001](https://doi.org/10.1016/j.cell.2014.10.001) [Medline](#)
16. T. Hussain, J. L. Llácer, B. T. Wimberly, J. S. Kieft, V. Ramakrishnan, Large-Scale Movements of IF3 and tRNA during Bacterial Translation Initiation. *Cell* **167**, 133–144.e13 (2016). [doi:10.1016/j.cell.2016.08.074](https://doi.org/10.1016/j.cell.2016.08.074) [Medline](#)
17. C. E. Aitken, P. Beznosková, V. Vlčkova, W.-L. Chiu, F. Zhou, L. S. Valášek, A. G. Hinnebusch, J. R. Lorsch, Eukaryotic translation initiation factor 3 plays distinct roles at the mRNA entry and exit channels of the ribosomal preinitiation complex. *eLife* **5**, e20934 (2016). [doi:10.7554/eLife.20934](https://doi.org/10.7554/eLife.20934) [Medline](#)
18. C. Sun, J. Querol-Audí, S. A. Mortimer, E. Arias-Palomo, J. A. Doudna, E. Nogales, J. H. D. Cate, Two RNA-binding motifs in eIF3 direct HCV IRES-dependent translation. *Nucleic Acids Res.* **41**, 7512–7521 (2013). [doi:10.1093/nar/gkt510](https://doi.org/10.1093/nar/gkt510) [Medline](#)
19. J. P. Erzberger, F. Stengel, R. Pellarin, S. Zhang, T. Schaefer, C. H. S. Aylett, P. Cimermančič, D. Boehringer, A. Sali, R. Aebersold, N. Ban, Molecular architecture of the 40S·eIF1·eIF3 translation initiation complex. *Cell* **158**, 1123–1135 (2014). [doi:10.1016/j.cell.2014.07.044](https://doi.org/10.1016/j.cell.2014.07.044) [Medline](#)
20. A. Simonetti, E. Guca, A. Bochler, L. Kuhn, Y. Hashem, Structural Insights into the Mammalian Late-Stage Initiation Complexes. *Cell Rep.* **31**, 107497 (2020). [doi:10.1016/j.celrep.2020.03.061](https://doi.org/10.1016/j.celrep.2020.03.061) [Medline](#)
21. M. D. Smith, L. Arake-Tacca, A. Nitido, E. Montabana, A. Park, J. H. Cate, Assembly of eIF3 Mediated by Mutually Dependent Subunit Insertion. *Structure* **24**, 886–896 (2016). [doi:10.1016/j.str.2016.02.024](https://doi.org/10.1016/j.str.2016.02.024) [Medline](#)
22. L. Cuchalová, T. Kouba, A. Herrmannová, I. Dányi, W.-L. Chiu, L. Valášek, The RNA recognition motif of eukaryotic translation initiation factor 3g (eIF3g) is required for resumption of scanning of posttermination ribosomes for reinitiation on GCN4 and together with eIF3i stimulates linear scanning. *Mol. Cell. Biol.* **30**, 4671–4686 (2010). [doi:10.1128/MCB.00430-10](https://doi.org/10.1128/MCB.00430-10) [Medline](#)

23. B. Eliseev, L. Yeramala, A. Leitner, M. Karupphasamy, E. Raimondeau, K. Huard, E. Alkalaeva, R. Aebersold, C. Schaffitzel, Structure of a human cap-dependent 48S translation pre-initiation complex. *Nucleic Acids Res.* **46**, 2678–2689 (2018). [doi:10.1093/nar/gky054](https://doi.org/10.1093/nar/gky054) [Medline](#)
24. C. S. Fraser, K. E. Berry, J. W. B. Hershey, J. A. Doudna, eIF3j is located in the decoding center of the human 40S ribosomal subunit. *Mol. Cell* **26**, 811–819 (2007). [doi:10.1016/j.molcel.2007.05.019](https://doi.org/10.1016/j.molcel.2007.05.019) [Medline](#)
25. C. H. S. Aylett, D. Boehringer, J. P. Erzberger, T. Schaefer, N. Ban, Structure of a yeast 40S-eIF1-eIF1A-eIF3-eIF3j initiation complex. *Nat. Struct. Mol. Biol.* **22**, 269–271 (2015). [doi:10.1038/nsmb.2963](https://doi.org/10.1038/nsmb.2963) [Medline](#)
26. L. ElAntak, S. Wagner, A. Herrmannová, M. Karásková, E. Rutkai, P. J. Lukavsky, L. Valásek, The indispensable N-terminal half of eIF3j/HCR1 cooperates with its structurally conserved binding partner eIF3b/PRT1-RRM and with eIF1A in stringent AUG selection. *J. Mol. Biol.* **396**, 1097–1116 (2010). [doi:10.1016/j.jmb.2009.12.047](https://doi.org/10.1016/j.jmb.2009.12.047) [Medline](#)
27. V. P. Pisareva, A. V. Pisarev, DHX29 and eIF3 cooperate in ribosomal scanning on structured mRNAs during translation initiation. *RNA* **22**, 1859–1870 (2016). [doi:10.1261/rna.057851.116](https://doi.org/10.1261/rna.057851.116) [Medline](#)
28. G. Gouridis, B. Hetzert, K. Kiosze-Becker, M. de Boer, H. Heinemann, E. Nürenberg-Goloub, T. Cordes, R. Tampé, ABCE1 Controls Ribosome Recycling by an Asymmetric Dynamic Conformational Equilibrium. *Cell Rep.* **28**, 723–734.e6 (2019). [doi:10.1016/j.celrep.2019.06.052](https://doi.org/10.1016/j.celrep.2019.06.052) [Medline](#)
29. A. Heuer, M. Gerovac, C. Schmidt, S. Trowitzsch, A. Preis, P. Kötter, O. Berninghausen, T. Becker, R. Beckmann, R. Tampé, Structure of the 40S-ABCE1 post-splitting complex in ribosome recycling and translation initiation. *Nat. Struct. Mol. Biol.* **24**, 453–460 (2017). [doi:10.1038/nsmb.3396](https://doi.org/10.1038/nsmb.3396) [Medline](#)
30. D. J. Young, N. R. Guydosh, Hcr1/eIF3j Is a 60S Ribosomal Subunit Recycling Accessory Factor In Vivo. *Cell Rep.* **28**, 39–50.e4 (2019). [doi:10.1016/j.celrep.2019.05.111](https://doi.org/10.1016/j.celrep.2019.05.111) [Medline](#)
31. P. Schütz, M. Bumann, A. E. Oberholzer, C. Bieniossek, H. Trachsel, M. Altmann, U. Baumann, Crystal structure of the yeast eIF4A-eIF4G complex: An RNA-helicase controlled by protein-protein interactions. *Proc. Natl. Acad. Sci. U.S.A.* **105**, 9564–9569 (2008). [doi:10.1073/pnas.0800418105](https://doi.org/10.1073/pnas.0800418105) [Medline](#)
32. P. Yourik, C. E. Aitken, F. Zhou, N. Gupta, A. G. Hinnebusch, J. R. Lorsch, Yeast eIF4A enhances recruitment of mRNAs regardless of their structural complexity. *eLife* **6**, e31476 (2017). [10.7554/eLife.31476](https://doi.org/10.7554/eLife.31476) [Medline](#)
33. C. Chapat, S. M. Jafarnejad, E. Matta-Camacho, G. G. Hesketh, I. A. Gelbart, J. Attig, C. G. Gkogkas, T. Alain, N. Stern-Ginossar, M. R. Fabian, A.-C. Gingras, T. F. Duchaine, N. Sonenberg, Cap-binding protein 4EHP effects translation silencing by microRNAs. *Proc. Natl. Acad. Sci. U.S.A.* **114**, 5425–5430 (2017). [doi:10.1073/pnas.1701488114](https://doi.org/10.1073/pnas.1701488114) [Medline](#)
34. D. J. Cattie, C. E. Richardson, K. C. Reddy, E. M. Ness-Cohn, R. Droste, M. K. Thompson, W. V. Gilbert, D. H. Kim, Mutations in Nonessential eIF3k and eIF3l Genes Confer

- Lifespan Extension and Enhanced Resistance to ER Stress in *Caenorhabditis elegans*. *PLoS Genet.* **12**, e1006326 (2016). [doi:10.1371/journal.pgen.1006326](https://doi.org/10.1371/journal.pgen.1006326) [Medline](#)
35. M. D. Smith, Y. Gu, J. Querol-Audí, J. M. Vogan, A. Nitido, J. H. D. Cate, Human-like eukaryotic translation initiation factor 3 from *Neurospora crassa*. *PLoS ONE* **8**, e78715 (2013). [doi:10.1371/journal.pone.0078715](https://doi.org/10.1371/journal.pone.0078715) [Medline](#)
36. S. K. Archer, N. E. Shirokikh, T. H. Beilharz, T. Preiss, Dynamics of ribosome scanning and recycling revealed by translation complex profiling. *Nature* **535**, 570–574 (2016). [doi:10.1038/nature18647](https://doi.org/10.1038/nature18647) [Medline](#)
37. J. Bohlen, K. Fenzl, G. Kramer, B. Bukau, A. A. Teلمان, Selective 40S Footprinting Reveals Cap-Tethered Ribosome Scanning in Human Cells. *Mol. Cell* **10.1016/j.molcel.2020.06.005** (2020). [doi:10.1016/j.molcel.2020.06.005](https://doi.org/10.1016/j.molcel.2020.06.005) [Medline](#)
38. Y. Yang, X. Fan, M. Mao, X. Song, P. Wu, Y. Zhang, Y. Jin, Y. Yang, L.-L. Chen, Y. Wang, C. C. Wong, X. Xiao, Z. Wang, Extensive translation of circular RNAs driven by N<sup>6</sup>-methyladenosine. *Cell Res.* **27**, 626–641 (2017). [doi:10.1038/cr.2017.31](https://doi.org/10.1038/cr.2017.31) [Medline](#)
39. S. E. Wells, P. E. Hillner, R. D. Vale, A. B. Sachs, Circularization of mRNA by eukaryotic translation initiation factors. *Mol. Cell* **2**, 135–140 (1998). [doi:10.1016/S1097-2765\(00\)80122-7](https://doi.org/10.1016/S1097-2765(00)80122-7) [Medline](#)
40. M. Kozak, A short leader sequence impairs the fidelity of initiation by eukaryotic ribosomes. *Gene Expr.* **1**, 111–115 (1991). [Medline](#)
41. K. Leppek, R. Das, M. Barna, Functional 5' UTR mRNA structures in eukaryotic translation regulation and how to find them. *Nat. Rev. Mol. Cell Biol.* **19**, 158–174 (2018). [doi:10.1038/nrm.2017.103](https://doi.org/10.1038/nrm.2017.103) [Medline](#)
42. A. S. Spirin, How does a scanning ribosomal particle move along the 5'-untranslated region of eukaryotic mRNA? Brownian Ratchet model. *Biochemistry* **48**, 10688–10692 (2009). [doi:10.1021/bi901379a](https://doi.org/10.1021/bi901379a) [Medline](#)
43. C. García-García, K. L. Frieda, K. Feoktistova, C. S. Fraser, S. M. Block, RNA BIOCHEMISTRY. Factor-dependent processivity in human eIF4A DEAD-box helicase. *Science* **348**, 1486–1488 (2015). [doi:10.1126/science.aaa5089](https://doi.org/10.1126/science.aaa5089) [Medline](#)
44. F. Rozen, I. Edery, K. Meerovitch, T. E. Dever, W. C. Merrick, N. Sonenberg, Bidirectional RNA helicase activity of eucaryotic translation initiation factors 4A and 4F. *Mol. Cell. Biol.* **10**, 1134–1144 (1990). [doi:10.1128/MCB.10.3.1134](https://doi.org/10.1128/MCB.10.3.1134) [Medline](#)
45. S. Takyar, R. P. Hickerson, H. F. Noller, mRNA helicase activity of the ribosome. *Cell* **120**, 49–58 (2005). [doi:10.1016/j.cell.2004.11.042](https://doi.org/10.1016/j.cell.2004.11.042) [Medline](#)
46. D. Tauber, G. Tauber, A. Khong, B. Van Treeck, J. Pelletier, R. Parker, Modulation of RNA Condensation by the DEAD-Box Protein eIF4A. *Cell* **180**, 411–426.e16 (2020). [doi:10.1016/j.cell.2019.12.031](https://doi.org/10.1016/j.cell.2019.12.031) [Medline](#)
47. K. Feoktistova, E. Tuvshintogs, A. Do, C. S. Fraser, Human eIF4E promotes mRNA restructuring by stimulating eIF4A helicase activity. *Proc. Natl. Acad. Sci. U.S.A.* **110**, 13339–13344 (2013). [doi:10.1073/pnas.1303781110](https://doi.org/10.1073/pnas.1303781110) [Medline](#)

48. S. V. Slepnev, N. L. Korneeva, R. E. Rhoads, Kinetic mechanism for assembly of the m7GpppG.eIF4E.eIF4G complex. *J. Biol. Chem.* **283**, 25227–25237 (2008). [doi:10.1074/jbc.M801786200](https://doi.org/10.1074/jbc.M801786200) [Medline](#)
49. A. S. Lee, P. J. Kranzusch, J. A. Doudna, J. H. D. Cate, eIF3d is an mRNA cap-binding protein that is required for specialized translation initiation. *Nature* **536**, 96–99 (2016). [doi:10.1038/nature18954](https://doi.org/10.1038/nature18954) [Medline](#)
50. M. Sokabe, C. S. Fraser, Human eukaryotic initiation factor 2 (eIF2)-GTP-Met-tRNA<sub>i</sub> ternary complex and eIF3 stabilize the 43 S preinitiation complex. *J. Biol. Chem.* **289**, 31827–31836 (2014). [doi:10.1074/jbc.M114.602870](https://doi.org/10.1074/jbc.M114.602870) [Medline](#)
51. M. A. Griffin, J. H. Davis, S. A. Strobel, Bacterial toxin RelE: A highly efficient ribonuclease with exquisite substrate specificity using atypical catalytic residues. *Biochemistry* **52**, 8633–8642 (2013). [doi:10.1021/bi401325c](https://doi.org/10.1021/bi401325c) [Medline](#)
52. J. Brito Querido, E. Mancera-Martínez, Q. Vicens, A. Bochler, J. Chicher, A. Simonetti, Y. Hashem, The cryo-EM Structure of a Novel 40S Kinetoplastid-Specific Ribosomal Protein. *Structure* **25**, 1785–1794.e3 (2017). [doi:10.1016/j.str.2017.09.014](https://doi.org/10.1016/j.str.2017.09.014) [Medline](#)
53. M. Götze, J. Pettelkau, R. Fritzsche, C. H. Ihling, M. Schäfer, A. Sinz, Automated assignment of MS/MS cleavable cross-links in protein 3D-structure analysis. *J. Am. Soc. Mass Spectrom.* **26**, 83–97 (2015). [doi:10.1007/s13361-014-1001-1](https://doi.org/10.1007/s13361-014-1001-1) [Medline](#)
54. C. J. Russo, S. Scotcher, M. Kyte, A precision cryostat design for manual and semi-automated cryo-plunge instruments. *Rev. Sci. Instrum.* **87**, 114302 (2016). [doi:10.1063/1.4967864](https://doi.org/10.1063/1.4967864) [Medline](#)
55. J. Zivanov, T. Nakane, B. O. Forsberg, D. Kimanius, W. J. Hagen, E. Lindahl, S. H. Scheres, New tools for automated high-resolution cryo-EM structure determination in RELION-3. *eLife* **7**, e42166 (2018). [doi:10.7554/eLife.42166](https://doi.org/10.7554/eLife.42166) [Medline](#)
56. A. Rohou, N. Grigorieff, CTFIND4: Fast and accurate defocus estimation from electron micrographs. *J. Struct. Biol.* **192**, 216–221 (2015). [doi:10.1016/j.jsb.2015.08.008](https://doi.org/10.1016/j.jsb.2015.08.008) [Medline](#)
57. I. B. Lomakin, T. A. Steitz, The initiation of mammalian protein synthesis and mRNA scanning mechanism. *Nature* **500**, 307–311 (2013). [doi:10.1038/nature12355](https://doi.org/10.1038/nature12355) [Medline](#)
58. T. Nakane, D. Kimanius, E. Lindahl, S. H. Scheres, Characterisation of molecular motions in cryo-EM single-particle data by multi-body refinement in RELION. *eLife* **7**, e36861 (2018). [doi:10.7554/eLife.36861](https://doi.org/10.7554/eLife.36861) [Medline](#)
59. S. Chen, G. McMullan, A. R. Faruqi, G. N. Murshudov, J. M. Short, S. H. W. Scheres, R. Henderson, High-resolution noise substitution to measure overfitting and validate resolution in 3D structure determination by single particle electron cryomicroscopy. *Ultramicroscopy* **135**, 24–35 (2013). [doi:10.1016/j.ultramic.2013.06.004](https://doi.org/10.1016/j.ultramic.2013.06.004) [Medline](#)
60. A. Waterhouse, M. Bertoni, S. Bienert, G. Studer, G. Tauriello, R. Gumienny, F. T. Heer, T. A. P. de Beer, C. Rempfer, L. Bordoli, R. Lepore, T. Schwede, SWISS-MODEL: Homology modelling of protein structures and complexes. *Nucleic Acids Res.* **46**, W296–W303 (2018). [doi:10.1093/nar/gky427](https://doi.org/10.1093/nar/gky427) [Medline](#)



61. Z. Wei, P. Zhang, Z. Zhou, Z. Cheng, M. Wan, W. Gong, Crystal structure of human eIF3k, the first structure of eIF3 subunits. *J. Biol. Chem.* **279**, 34983–34990 (2004). [doi:10.1074/jbc.M405158200](https://doi.org/10.1074/jbc.M405158200) [Medline](#)
62. J. L. Llácer, T. Hussain, A. K. Saini, J. S. Nanda, S. Kaur, Y. Gordiyenko, R. Kumar, A. G. Hinnebusch, J. R. Lorsch, V. Ramakrishnan, Translational initiation factor eIF5 replaces eIF1 on the 40S ribosomal subunit to promote start-codon recognition. *eLife* **7**, e39273 (2018). [doi:10.7554/eLife.39273](https://doi.org/10.7554/eLife.39273) [Medline](#)
63. E. Schmitt, M. Panvert, C. Lazennec-Schurdevin, P.-D. Coureux, J. Perez, A. Thompson, Y. Mechulam, Structure of the ternary initiation complex aIF2-GDPNP-methionylated initiator tRNA. *Nat. Struct. Mol. Biol.* **19**, 450–454 (2012). [doi:10.1038/nsmb.2259](https://doi.org/10.1038/nsmb.2259) [Medline](#)
64. D. T. Jones, Protein secondary structure prediction based on position-specific scoring matrices. *J. Mol. Biol.* **292**, 195–202 (1999). [doi:10.1006/jmbi.1999.3091](https://doi.org/10.1006/jmbi.1999.3091) [Medline](#)
65. S. K. Natchiar, A. G. Myasnikov, H. Kratzat, I. Hazemann, B. P. Klaholz, Visualization of chemical modifications in the human 80S ribosome structure. *Nature* **551**, 472–477 (2017). [doi:10.1038/nature24482](https://doi.org/10.1038/nature24482) [Medline](#)
66. A. Casañal, B. Lohkamp, P. Emsley, Current Developments in Coot for Macromolecular Model Building of Electron Cryo-microscopy and Crystallographic Data. *Protein Sci.* **29**, 1055–1064 (2020). [doi:10.1002/pro.3791](https://doi.org/10.1002/pro.3791) [Medline](#)
67. P. V. Afonine, B. K. Poon, R. J. Read, O. V. Sobolev, T. C. Terwilliger, A. Urzhumtsev, P. D. Adams, Real-space refinement in PHENIX for cryo-EM and crystallography. *Acta Crystallogr. D* **74**, 531–544 (2018). [doi:10.1107/S2059798318006551](https://doi.org/10.1107/S2059798318006551) [Medline](#)
68. L. Zimmermann, A. Stephens, S.-Z. Nam, D. Rau, J. Kübler, M. Lozajic, F. Gabler, J. Söding, A. N. Lupas, V. Alva, A Completely Reimplemented MPI Bioinformatics Toolkit with a New HHpred Server at its Core. *J. Mol. Biol.* **430**, 2237–2243 (2018). [doi:10.1016/j.jmb.2017.12.007](https://doi.org/10.1016/j.jmb.2017.12.007) [Medline](#)
69. E. F. Pettersen, T. D. Goddard, C. C. Huang, G. S. Couch, D. M. Greenblatt, E. C. Meng, T. E. Ferrin, UCSF Chimera—A visualization system for exploratory research and analysis. *J. Comput. Chem.* **25**, 1605–1612 (2004). [doi:10.1002/jcc.20084](https://doi.org/10.1002/jcc.20084) [Medline](#)
70. T. D. Goddard, C. C. Huang, E. C. Meng, E. F. Pettersen, G. S. Couch, J. H. Morris, T. E. Ferrin, UCSF ChimeraX: Meeting modern challenges in visualization and analysis. *Protein Sci.* **27**, 14–25 (2018). [doi:10.1002/pro.3235](https://doi.org/10.1002/pro.3235) [Medline](#)
71. T. Becker, S. Franckenberg, S. Wickles, C. J. Shoemaker, A. M. Anger, J.-P. Armache, H. Sieber, C. Ungewickell, O. Berninghausen, I. Daberkow, A. Karcher, M. Thomm, K.-P. Hopfner, R. Green, R. Beckmann, Structural basis of highly conserved ribosome recycling in eukaryotes and archaea. *Nature* **482**, 501–506 (2012). [doi:10.1038/nature10829](https://doi.org/10.1038/nature10829) [Medline](#)
72. A. Brown, S. Shao, J. Murray, R. S. Hegde, V. Ramakrishnan, Structural basis for stop codon recognition in eukaryotes. *Nature* **524**, 493–496 (2015). [doi:10.1038/nature14896](https://doi.org/10.1038/nature14896) [Medline](#)

73. S. Grüner, D. Peter, R. Weber, L. Wohlbold, M.-Y. Chung, O. Weichenrieder, E. Valkov, C. Igreja, E. Izaurralde, The Structures of eIF4E-eIF4G Complexes Reveal an Extended Interface to Regulate Translation Initiation. *Mol. Cell* **64**, 467–479 (2016).  
[doi:10.1016/j.molcel.2016.09.020](https://doi.org/10.1016/j.molcel.2016.09.020) [Medline](#)
